1 **Title:** The Role and Regulation of Intramuscular Sex Hormones in Skeletal Muscle: A  
2 Systematic Review

3

4 **Authors:** Viktor Engman<sup>1</sup>, Annabel J. Critchlow<sup>1</sup>, Eija K. Laakkonen<sup>2</sup>, Mette  
5 Hansen<sup>3</sup>, Shaun Mason<sup>1</sup>, Séverine Lamon<sup>1</sup>.

6 <sup>1</sup>Institute for Physical Activity and Nutrition, School of Exercise and Nutrition  
7 Sciences, Deakin University, Geelong, Australia

8 <sup>2</sup>Faculty of Sport and Health Sciences, University of Jyväskylä, Jyväskylä, Finland

9 <sup>3</sup>Department of Public Health, Aarhus University, Aarhus, Denmark

10

11 **Corresponding author:**

12 Associate Professor Séverine Lamon

13 ORCID ID: 0000-0002-3271-6551

14 Institute for Physical Activity and Nutrition

15 Deakin University, 221 Burwood Hwy, Victoria 3125, Australia

16 Ph: (+61 3) 9244 5571

17 Email: [severine.lamon@deakin.edu.au](mailto:severine.lamon@deakin.edu.au)

18 Supported by an Australian Research Council Future Fellowship (FT210100278).

19 **Disclosure statement:** The authors have nothing to disclose.

20 **Keywords:** Testosterone, Oestrogen, Sex hormones, Skeletal muscle.

# 1 Abstract

**Introduction:** Serum concentrations of androgens and oestrogens, the main male and female sex hormones, respectively, naturally fluctuate across the lifespan. Sex hormones are mainly produced in the gonads, but evidence suggests that they can also be locally synthesised in skeletal muscle. However, little is known about the purpose of intramuscular sex hormones biosynthesis and their role in skeletal muscle. This systematic review aimed to investigate 1) how intramuscular sex hormone levels vary across the lifespan, 2) whether intramuscular sex hormones are associated with skeletal muscle mass and function, and 3) whether exercise affects intramuscular sex hormone levels. **Methods:** Four databases were searched, and studies were included if they contained measurements of intramuscular sex hormones from healthy males and females free from any hormonal treatment, from rodents, or from cultured muscle cells. **Results:** Fifteen studies were included. Intramuscular testosterone was reduced in elderly males compared to their younger counterparts, but comparison of intramuscular sex hormone levels between pre- and postmenopausal females yielded inconclusive findings. Intramuscular androgens were positively associated with muscle mass and strength in males. In females, conflicting findings were reported for both oestradiol and androgens, and measures of muscle mass and function. Chronic exercise decreased androgens and oestradiol in females, but increased androgens in males. Acute exercise did not change intramuscular hormone levels in humans but increased them in rodents and cells. **Conclusion:** Current evidence suggests that ageing and exercise differentially modulate intramuscular sex hormone levels, and their association with muscle mass and function, between males and females.

## 2 Introduction

Maintenance of muscle mass and function is an integral part of healthy ageing. Across adulthood, muscle is lost at a median decennial rate of 4.7% in males and 3.7% in females,<sup>1</sup> which is associated with increased mortality,<sup>2</sup> loss of independence and reduced quality of life.<sup>3,4</sup> In comparison to younger adults, older individuals exhibit a diminished anabolic response to hypertrophic stimuli, such as resistance exercise and protein intake,<sup>5,6</sup> which impairs their capacity to counteract age-related muscle loss.

Skeletal muscle is a particularly sex-biased organ with nearly 3000 genes differentially expressed between males and females in a postabsorptive state.<sup>7</sup> Consequently, males and females present distinct muscle phenotypes, which differ in terms of fibre type proportions, substrate metabolism, contractile speed and fatigability.<sup>8-10</sup> The rate of age-related muscle mass and functional decline is also sex-dependent,<sup>11,12</sup> with atrophy and functional impairments being more pronounced and severe in postmenopausal females.<sup>13</sup> Even though the ageing skeletal muscle transcriptomic signature is largely similar between sexes, the extent of the differentially expressed genes between young and older adults is sex-dependent.<sup>14,15</sup>

Physiological sex differences emerge as early as the first trimester of gestation but are accentuated during puberty, concomitant to the elevated secretion of sex steroid hormones,<sup>16-20</sup> predominantly androgens and oestrogens. After puberty, the serum levels of the androgen hormone testosterone is ~15 times higher in males than females.<sup>21</sup> Endogenous serum testosterone levels are positively associated with muscle mass and strength in males,<sup>22,23</sup> but not in females.<sup>24</sup> However, supraphysiological testosterone levels achieved through exogenous administration

69 have significant anabolic effects in both sexes, resulting in substantial and rapid  
70 increases in muscle mass and strength.<sup>25-28</sup>

71 The most potent of oestrogens, oestradiol (E2), fluctuates in the blood during the  
72 menstrual cycle in premenopausal females and is markedly enhanced during  
73 pregnancy.<sup>29</sup> Otherwise, E2 remains relatively stable during the reproductive years of  
74 adulthood.<sup>30,31</sup> During menopause, females experience a rapid and permanent  
75 decline in E2 levels whereas male levels are unaltered with ageing.<sup>31</sup> The  
76 relationship between serum oestrogen and indices of muscle mass and function  
77 remains equivocal, with conflicting findings regarding both muscle mass and strength  
78 in females,<sup>32</sup> and no apparent association in males.<sup>33,34</sup>

79 Serum sex hormone levels may be modified through exercise. Initiation of resistance  
80 training may increase basal testosterone levels in males but not females,<sup>35,36</sup> which  
81 may progressively increase for years with intense exercise training.<sup>36,37</sup> Even though  
82 basal testosterone levels are associated with muscle hypertrophy and strength  
83 gains,<sup>25,28</sup> muscle hypertrophy can occur when endogenous testosterone levels are  
84 suppressed, albeit to a lesser magnitude.<sup>38</sup> Others have suggested that the exercise  
85 induced elevations in androgen receptor (AR) content might be a determining factor  
86 for hypertrophic potential.<sup>39,40</sup> More recently, nuclear AR content was found to  
87 correlate with muscle hypertrophy in males, but not females, highlighting a potential  
88 sex-based discrepancy in the mechanisms of muscle hypertrophy.<sup>41,42</sup>

89 Serum E2 levels acutely increase during endurance exercise in both young females  
90 and males.<sup>43</sup> In females, the increments appear to be mediated by the menstrual  
91 status. Nakamura *et al.*<sup>44</sup> found that in eumenorrheic females, acute increments in  
92 circulating E2 levels were only detectable in the mid-luteal phase and absent in the

early follicular phase, while E2 remains unchanged following acute exercise in postmenopausal females.<sup>45</sup> Further, E2 was also unchanged in amenorrhoeic females following acute exercise.<sup>44</sup> The acute exercise-induced increases in E2 observed in eumenorrhoeic females and males may be transient, as longitudinal training studies have failed to replicate such results over time.<sup>46,47</sup>

Classically, skeletal muscle was thought of as merely a target tissue for sex hormone signalling, as it expresses both the AR and oestrogen receptors (ERs).<sup>39,48,49</sup> However, extragonadal biosynthesis of steroid hormones occurs in a plethora of tissues,<sup>50</sup> including skeletal muscle. Aizawa *et al.* (2007)<sup>51</sup> first showed that skeletal muscle from male rats expresses the necessary enzymes, namely 3-beta-hydroxysteroid dehydrogenase (3 $\beta$ -HSD) and 17-beta-hydroxysteroid dehydrogenase (17 $\beta$ -HSD), to synthesise testosterone from its precursor dehydroepiandrosterone (DHEA) and aromatase cytochrome P-450 (P450arom) to convert testosterone into E2. Using DHEA treated rat myotubes, they also demonstrated a dose response relationship between DHEA concentration and subsequent intramuscular levels of testosterone and E2. Further, 3-oxo-5 $\alpha$ -steroid 4-dehydrogenase (5 $\alpha$ -reductase), the enzyme enabling the conversion of testosterone to the more potent DHT, is also expressed in cultured rodent skeletal muscle.<sup>52</sup> The expression of these enzymes has subsequently been confirmed in human male and female skeletal muscle.<sup>53,54</sup>

The role, regulation, and function of intramuscular sex hormones on skeletal muscle health is yet to be systematically reviewed to further our understanding of how sex hormones might relate to muscle mass and function over the lifespan. The objectives of this review were threefold and aimed to address the following research questions: 1) whether intramuscular sex hormones vary across the life span in humans; 2)

whether intramuscular sex hormones are associated with muscle mass and function or increments in these, and 3) whether exercise impacts intramuscular sex hormone levels.

## 3 Methods

### 3.1 Search Strategy

The systematic review was registered at PROSPERO (CRD42023479951). Four databases (MEDLINE Complete, EMBASE, SPORTDiscus, and PubMed) were searched according to the full search criteria outlined in supplementary table S1. The databases were searched until October 27<sup>th</sup>, 2023.

#### 3.1.1 Inclusion and exclusion criteria

In brief, study subjects included healthy adults, rodent models and *in vitro* cell models all free from hormonal treatments. Measures of intramuscular sex hormones and/or enzymes involved in the hormone biosynthesis were required for all included studies. Different eligibility criteria were applied to answer the different research questions as outlined in supplementary table S2.

#### 3.1.2 Screening and selection

Following the database search, the relevant papers were imported into Covidence systematic review software (Veritas Health Innovation, Melbourne, Australia).<sup>55</sup> Duplicates were automatically removed. Two authors independently assessed eligibility through title and abstract screening and subsequently full-text assessment and removed irrelevant studies according to the pre-specified eligibility criteria. The PRISMA search diagram has been outlined in figure 1.

### 3.1.3 Data extraction and quality assessment

Information about study design, study subjects, methodology, and results were independently extracted by two authors from all eligible studies using a predesigned data extraction form in Covidence. Any conflicts between the two authors were resolved by jointly extracting the data from the relevant study.

Quality assessment was conducted using the appropriate Joanna Briggs Institute (JBI) critical appraisal tool for human studies based on the study design (cross sectional, randomised controlled trial, quasi experimental trial).<sup>56,57</sup> Here, the percentage of “yes” answers were tallied and scored accordingly: ≤49% yes = high risk of bias, 50-69% yes = moderate risk of bias, ≥70% yes = low risk of bias. Animal studies were appraised using SYRCLE’s risk of bias tool for animal studies and *in vitro* studies using an adapted version of the JBI Randomised Controlled Trial critical appraisal tool.<sup>58</sup>

### 3.1.4 Methods of synthesis

During the data extraction process, the included studies were assigned, analysed, and discussed according to each of the relevant aims. Due to anticipated study heterogeneity, study outcomes were not combined quantitatively into a meta-analysis. The strength of associations between intramuscular hormones and measures of muscle mass and function was converted to Pearson’s correlation coefficient where applicable and referred to as small ( $r \geq 0.1$  and  $< 0.3$ ), moderate ( $r \geq 0.3$  and  $< 0.5$ ), or large ( $r \geq 0.5$ ).

## 4 Results

### 4.1 Study characteristics

Following the database search and screening, 23 studies were included for full-text analysis, and 15 studies were deemed eligible. Three studies investigated how intramuscular sex hormones varied across the lifespan (aim 1),<sup>53,54,59</sup> eight studies investigated the putative relationship between intramuscular hormones and muscle mass and function (aim 2),<sup>39,45,53,54,59-62</sup> and 13 studies investigated the relationship between exercise and intramuscular sex hormone concentrations (aim 3).<sup>39,45,54,60-69</sup> Eight studies were excluded due to unavailability of a full-texts (n=3), incomplete information (n=1), and incorrect population (n=4).

### 4.2 Quality assessment

Using the JBI risk of bias tools, the cross-sectional human studies presented a moderate risk of bias,<sup>53,59</sup> and the quasi-experimental human trials all presented a low risk of bias.<sup>54,65-68</sup> Out of the two randomised controlled trials, one presented a low risk of bias whereas the other presented a high risk of bias.<sup>39,45</sup> Animal trials were critically appraised using the SYRCLE tool, where all included studies had a similar risk of bias, notably missing information on researcher blinding.<sup>60,62-64</sup> The two *in vitro* cell culture studies were critically appraised using a JBI adapted critical appraisal tool with variations in methodological explication.<sup>61,69</sup> The full quality assessment has been outlined in supplementary tables S3-S7.

### 4.3 Intramuscular sex hormone levels across the lifespan

Three human studies provided cross sectional data and measured intramuscular sex hormones via enzyme-linked immunosorbent assay (ELISA) or enzyme immunoassays (EIA). Two of these studies examined differences in intramuscular



sex hormone levels between pre- and postmenopausal females,<sup>53,59</sup> and one between young and older males (Table 1).<sup>54</sup> The findings were inconsistent across studies. In females, Pöllänen *et al.* (2015)<sup>59</sup> found that intramuscular E2 and testosterone were similar between pre- and postmenopausal females whereas intramuscular DHT was higher in the postmenopausal females. The same group (2011)<sup>53</sup> had however reported the opposite in an earlier study, where levels of intramuscular E2 and testosterone were elevated in the postmenopausal females compared to premenopausal females, and intramuscular DHT remained similar between the groups. Intramuscular DHEA did not differ between pre- and postmenopausal females in both studies.<sup>53,59</sup> Compared to premenopausal females, postmenopausal females had increased intramuscular 3 $\beta$ -HSD mRNA levels whereas intramuscular 17 $\beta$ -HSD, and 5 $\alpha$ -reductase type 1 and 2 mRNA were unaltered by menopausal status.<sup>53</sup> In males, intramuscular free testosterone, DHT, DHEA, 3 $\beta$ -HSD, 17 $\beta$ -HSD, and 5 $\alpha$ -reductase were all decreased in the older when compared to the young group.<sup>54</sup>

#### **4.4 Intramuscular sex hormones and muscle mass and function**

Eight studies investigated the putative association between intramuscular sex hormones and muscle mass and function (Table 2).

##### **4.4.1 Muscle mass and composition**

Four human studies, two animal studies, and one cell culture study assessed the putative associations between intramuscular sex hormones and measures of muscle mass and composition (Table 2). Following 12 weeks of aerobic exercise in male rats, a moderate significant positive correlation was found between gastrocnemius mass and intramuscular DHT levels.<sup>60</sup> In ovariectomised female rats following 5

weeks of aerobic exercise, soleus mass presented a strong significant positive association with intramuscular E2 levels.<sup>62</sup>

In postmenopausal females, Dalgaard *et al.*<sup>45</sup> reported large significant negative associations between intramuscular DHEA and lean body mass (LBM), and intramuscular DHEA and muscle cross sectional area (CSA), but found no such associations for intramuscular testosterone or E2. The same study found no associations between change in intramuscular DHEA, testosterone, and E2, and change in LBM and muscle CSA following a resistance training intervention.<sup>45</sup> Pöllänen *et al.* (2011)<sup>53</sup> assessed computed tomography attenuation (to infer fat infiltration, where a lower attenuation suggests a greater fat infiltration) in the quadriceps femoris (QF) muscle. They reported significant low to moderate negative associations between intramuscular E2 and testosterone, and QF attenuation, with no significant findings for intramuscular DHEA and DHT.<sup>53</sup>

In younger males, Morton *et al.*<sup>39</sup> pooled data from the highest (n=10) and lowest (n=10) exercise responders and found no significant associations between baseline, post intervention, or change in intramuscular free testosterone, DHT, and 5 $\alpha$ -reductase protein levels, and exercise induced changes in type I and II muscle fibre CSA and LBM. In older males, Sato *et al.*<sup>54</sup> reported moderate to strong correlations between increments in intramuscular free testosterone and DHT, and gains in quadriceps CSA. Feng *et al.*<sup>61</sup> found a strong significant positive correlation between intracellular E2 concentration and cell proliferation index in C2C12 cells following 8 hours of mechanical stretch.

#### 4.4.2 Muscle strength and function

Four human studies assessed the putative association between intramuscular sex hormones and measures of muscle strength and function (Table 2). Following a 12-week resistance training intervention in older males, the increase in intramuscular free testosterone, DHT, and DHEA all presented a significant moderate to strong positive correlation with exercise induced increments in isokinetic leg extensor torque.<sup>54</sup>

In postmenopausal females, Dalgaard *et al.*<sup>45</sup> found no significant associations between intramuscular DHEA, testosterone, and E2, and maximal voluntary contraction (MVC) during leg flexion (MVCflex) and leg extension (MVCex), and muscle strength normalised to muscle CSA at baseline. Following an exercise intervention, maintenance of the intramuscular DHEA levels was strongly associated with improvements in MVCex, but not changes in MVCflex. Similarly, maintenance of intramuscular testosterone was strongly associated with improvements in MVCex and normalised muscle strength, but not MVCflex. Also, maintenance of intramuscular E2 was associated with improvements in normalised muscle strength.<sup>45</sup>

In grouped samples of pre- and postmenopausal females, intramuscular E2, testosterone and DHEA, but not DHT, presented significant strong associations with knee extensor strength.<sup>59</sup> However, in another study from the same group using a similar sample and design, they reported no significant associations between intramuscular E2, testosterone, DHEA, or DHT, and knee extensor strength when normalised to quadriceps femoris CSA.<sup>53</sup>

Muscle power was indirectly tested by two studies. Pöllänen *et al.* (2015)<sup>59</sup> found significant strong correlations between intramuscular E2, testosterone, and DHEA, but not DHT, and vertical jump height in their mixed cohort of pre- and postmenopausal females. Dalgaard *et al.*<sup>45</sup> found no significant associations between any of the intramuscular DHEA, testosterone, and E2 and vertical jump height, neither at baseline nor when comparing changes in the intramuscular hormones to changes in vertical jump height, only including postmenopausal females.

## **4.5 Exercise, intramuscular sex hormones and expression of the local intramuscular sex hormone biosynthesis machinery**

### **4.5.1 Acute exercise**

Thirteen studies investigated the effects of acute (n=9) and chronic (n=5) effects of exercise on intramuscular sex hormone levels in humans (n=7), rats (n=4) or cells (n=2) (Table 3). In human males and females, a single session of resistance training (n=5 studies) did not change the intramuscular levels of testosterone, E2, DHT, DHEA nor protein levels for the key enzymes 3 $\beta$ -HSD, 17 $\beta$ -HSD, P450arom and 5 $\alpha$ -reductase.<sup>45,65-68</sup>

In contrast, in rats, a single session of aerobic training (n=2 studies) increased the intramuscular levels of testosterone, DHT, and DHEA in both male and female rats.<sup>63,64</sup> Intramuscular E2 increased in male but not female rats. Intramuscular 5 $\alpha$ -reductase mRNA levels remained unchanged in males but increased in female rats, while its protein levels increased in both sexes. Both intramuscular P450arom mRNA and protein levels increased in males, but significantly decreased in female rats. Intramuscular 3 $\beta$ -HSD mRNA increased in males but remained unchanged in female

rats. Intramuscular 17 $\beta$ -HSD mRNA was unchanged in males but increased in female rats, while intramuscular 17 $\beta$ -HSD protein increased in both.<sup>63,64</sup>

Using a C2C12 myotube model of acute mechanical stretch, Feng *et al.*<sup>61</sup> found that intracellular E2 levels increased following the intervention, intracellular 3 $\beta$ -HSD mRNA decreased but intracellular 3 $\beta$ -HSD protein increased, intracellular 17 $\beta$ -HSD mRNA and protein increased, and intracellular P450arom mRNA increased but not intracellular P450arom protein. Also in C2C12 cells, Son *et al.*<sup>69</sup> applied electric pulse stimulation for 24h, which resulted in significant increases in intracellular free testosterone and 5 $\alpha$ -reductase protein levels, but not in DHT levels.

#### **4.5.2 Chronic exercise**

In a chronic resistance exercise intervention (n=49), subgroup analysis of the ten highest responders (as determined by myofiber CSA and LBM accretion) revealed no effect on intramuscular levels of free testosterone and DHT, but an increase in the 5 $\alpha$ -reductase protein levels.<sup>39</sup> In the ten lowest responders, intramuscular levels of free testosterone, DHT and 5 $\alpha$ -reductase protein levels were unaltered.<sup>39</sup> In older males, chronic resistance training increased the intramuscular levels of testosterone, DHT, and DHEA, as well as intramuscular 3 $\beta$ -HSD, 17 $\beta$ -HSD, and 5 $\alpha$ -reductase protein levels following chronic resistance training.<sup>54</sup> In postmenopausal females, chronic resistance training led to significant decreases in intramuscular DHEA, testosterone, and E2.<sup>45</sup>

In female rats, chronic aerobic training did not affect intramuscular E2 levels in the plantaris muscle but increased in the soleus when analysed using ELISA, whilst intramuscular E2 levels increased in both muscles when analysed using immunofluorescent staining.<sup>62</sup> Intramuscular P450arom was elevated in both

muscles from female rats following exercise.<sup>62</sup> In male rats, intramuscular total and free testosterone, and DHEA remained unaltered whilst DHT increased after the aerobic training period.<sup>60</sup> Further, intramuscular 3 $\beta$ -HSD mRNA, and 5 $\alpha$ -reductase mRNA and protein and intramuscular P450arom mRNA and protein all increased whilst 17 $\beta$ -HSD mRNA and protein remained unaltered.<sup>60</sup>

## 5 Discussion

In the last two decades, more research has emerged investigating the role and regulation of intramuscular sex hormones, particularly testosterone and E2. Here we aimed to investigate 1) whether intramuscular sex hormones levels vary across the life span in humans, 2) whether intramuscular sex hormones levels are associated with muscle mass and function, or increments in these, and 3) whether exercise impacts intramuscular sex hormone levels and biosynthesis machinery.

### 5.1 Intramuscular sex hormone regulation

It is currently unclear whether there is a relationship between the levels of serum and intramuscular sex hormones, as determination of the biosynthesis location of the sex hormones measured within the muscle remains challenging. However, based on cell, animal, and human research intramuscular sex hormone regulation appears to be decoupled from that of serum hormones and possibly affected by some other signalling factors in serum. Using cultured rat myotubes Aizawa *et al.* (2007)<sup>51</sup> found that when the cells were incubated with DHEA, a bloodborne testosterone precursor, they synthesised testosterone and E2 in a DHEA dose-dependent manner. This suggests that skeletal muscle has the ability to synthesise these sex hormones in the presence of their precursors. These findings have subsequently been replicated by Pöllänen *et al.* (2015)<sup>59</sup> in human primary muscle cells. Incubation of cells in pre- or postmenopausal sera resulted in distinct expression patterns of the ERs. However,

the ER gene expressions did not differ between cells exposed to the postmenopausal sera from females with elevated E2 due to hormone replacement therapy (HRT) and those without. This suggests that other factors in the sera that varies with menopausal status, other than E2 itself, may affect intracellular hormone signalling.<sup>59</sup> In line with this hypothesis, they also reported that the intracellular hormone receptors were unaffected by incubation with pure E2.<sup>59</sup> Adding further complexity, differentiation of myoblasts to myotubes led to increased gene expression of P450arom, ERs and AR, but did not affect E2 levels, indicating that merely increasing the steroid hormone biosynthetic machinery does not lead to increased synthesis of E2.<sup>59</sup> Hence, the interplay between systemic and intramuscular hormone levels, and the gene expression along their synthesis pathway and their target receptors remains elusive.

In animal models, ovariectomy, that is, the removal of the ovaries to mimic a postmenopausal state, reduces the circulating levels of sex hormones in rats.<sup>70</sup> Shi *et al.*<sup>62</sup> reported that 5 weeks of treadmill running in ovariectomised rats increased intramuscular E2 levels. As they did not report circulating E2 levels, it is not entirely clear where these increments originate from. As reported by Zhao *et al.*,<sup>70</sup> plasma E2 increments occur in the months following ovariectomy, which could potentially increase the intramuscular E2 levels, questioning the validity of ovariectomy as a model of the postmenopausal state. Exercise also promoted the expression of P450arom protein concomitant to the E2 increase, which suggests that the intramuscular increase in E2 might occur from intramuscular origins.

In humans, Pöllänen *et al.* (2015)<sup>59</sup> found no difference in intramuscular E2 between postmenopausal female twins where one twin used oestrogen containing HRT, and the other one did not. Likewise, following a 12-week progressive resistance training

intervention in a group of postmenopausal females receiving either oestrogen treatment or placebo, Dalgaard *et al.*<sup>45</sup> reported that whilst the serum E2 increased in the oestrogen treatment group, the intramuscular E2 and testosterone remained the same between the treatment and placebo condition. Further, whilst the resistance exercise intervention did not affect the circulating E2 and testosterone levels, the intramuscular E2 and testosterone levels were decreased. Altogether this suggests that intramuscular hormone levels are decoupled from serum hormone levels.

## 5.2 Intramuscular sex hormones and ageing

It is well established that serum E2 concentrations abruptly drop at menopause,<sup>31</sup> a pattern not conclusively reflected in the muscle. Pöllänen *et al.* (2011)<sup>53</sup> reported elevated intramuscular E2 levels in postmenopausal females compared to premenopausal counterparts, a pattern however not replicated in another study by the same group,<sup>59</sup> where intramuscular E2 levels remained unchanged across menopause. Similar inconclusive results were reported for testosterone and DHT in the two studies.<sup>53,59</sup> Nevertheless, both studies highlighted an increased ratio of intramuscular-to-serum hormone levels in the postmenopausal females compared to their premenopausal counterparts.<sup>53,59</sup> In contrast, when comparing young and old males, Sato *et al.*<sup>54</sup> found that intramuscular testosterone, DHT, and DHEA levels mirrored the age-related reduction in the serum hormones.

The reasons for the divergent findings of Pöllänen *et al.* (2011)<sup>53</sup> and (2015)<sup>59</sup>, and Sato *et al.*<sup>54</sup> are unclear but there are several differences between the studies that may hinder a robust comparison. The age gap between the younger and older group was substantially greater in Sato *et al.*<sup>54</sup> than in both Pöllänen *et al.* (2011)<sup>53</sup> and (2015)<sup>59</sup>. The former cohort also presented significant differences in body composition between the younger and older groups, whilst the pre- and



postmenopausal females were anthropometrically matched in both Pöllänen *et al.* (2011) and (2015).<sup>53,54,59</sup> Both age and body composition are well established moderators of systemic sex hormone levels.<sup>18,71</sup> Although intramuscular sex hormone levels appear to be regulated somewhat independently from the systemic sex hormones, one cannot exclude the possibility that age- and body composition affect the intramuscular sex hormones too, perhaps in a sex-specific manner. Future studies should control for these putative confounding variables.

### **5.3 Intramuscular sex hormones and their association with muscle mass and function**

Associations between circulating physiological levels of testosterone and lean body mass have been found in males,<sup>22</sup> but not females,<sup>24</sup> with some equivocal findings in the relationship between E2 and muscle mass in females.<sup>24</sup> In postmenopausal females, the relationship between intramuscular sex hormones and muscle mass reflected the circulating hormones, as intramuscular testosterone and E2 were not associated with muscle mass.<sup>24,32,45</sup> However, similar to circulating androgens, intramuscular androgens were associated with muscle CSA, but only in older males.<sup>22,39,54</sup>

Following an exercise intervention, it was found that exercise induced increments in intramuscular androgens and E2 were correlated to muscle mass and muscle cross sectional area in older males, and male and female rats,<sup>54,60,62</sup> but not younger males or postmenopausal females.<sup>39,45</sup> In females, increased intramuscular sex hormone levels were associated with a greater proportion of fat infiltration.<sup>53</sup> Notably, the aforementioned human trials found that the higher intramuscular testosterone levels the lower the muscle mass and the greater the loss of muscle quality (increased fat infiltration), while circulating testosterone levels did not correlate with

either muscle mass or muscle quality.<sup>53,54</sup> Fat tissue has a steroidogenic capacity, which appears to increase with age.<sup>72</sup> Likewise, intramuscular fat infiltration also increases with age,<sup>73</sup> making it possible that the associations between greater fat infiltration and intramuscular sex hormones originate from increased hormonal biosynthesis from the fat tissue. However, in a pooled sample of postmenopausal females randomised to either transdermal oestrogen replacement therapy or placebo and undergoing a resistance training intervention, intramuscular E2 and testosterone levels significantly decreased despite unaltered intramuscular fat levels. Further, no association between intramuscular sex hormones and intramuscular fat content was found,<sup>45</sup> altogether refuting the notion that the fat infiltration is the main determinant of intramuscular sex hormone levels.

Absolute knee extensor strength showed significant positive associations with several androgens in males and females, and E2 in females.<sup>54,59</sup> In females, these associations disappeared when normalised to muscle CSA.<sup>53</sup> However, even though Dalgaard *et al.*<sup>45</sup> found that both intramuscular testosterone and E2 decreased following a 12-week resistance training intervention in postmenopausal females, they did find that the better the maintenance of these intramuscular hormones, the greater the improvement of muscle function. Whilst Pöllänen *et al.* (2015)<sup>59</sup> reported their strongest associations between intramuscular sex hormones and vertical jump height in females, suggesting that the intramuscular hormones may modulate muscle contractile properties. Dalgaard *et al.*<sup>45</sup> found a numerical but non-significant association between intramuscular testosterone and E2, where the maintenance of testosterone and E2 were positively correlated with increased vertical jump height, albeit with a smaller cohort increasing the risk for a type II error. Generally, animal research supports the plausible association between muscle contractile properties

and intramuscular hormones, where avian and rodent research both indicate that fast twitch muscle phenotypes tend to express higher levels of the intramuscular sex hormones and the associated biosynthetic enzymes than more slow twitch muscle phenotypes.<sup>74</sup> Currently, intramuscular sex hormones' putative effect on contractile properties remains speculative. Future research should consider human fibre type specific measures of intramuscular sex hormones.

#### **5.4 Exercise to manipulate intramuscular sex hormone levels**

A single resistance exercise training session did not affect intramuscular sex hormone levels in human, with all five studies included reporting no effect on intramuscular hormone levels and the gene and/or protein expression of relevant enzymes along the synthesis pathway.<sup>45,65-68</sup> In adult males, the most pronounced post-exercise elevation in circulating total testosterone is seen immediately following exercise cessation with a decrease of 0.015 nmol/L for each minute that follows thereafter.<sup>75</sup> The included trials conducted post exercise biopsies from 10 minutes to 24 hours after the final exercise session, with only one study measuring the intramuscular hormone levels within 30 minutes following exercise, which is when the transient increase in serum testosterone typically returns to baseline.<sup>75</sup> Contrasting the results of the human trials, single bouts of running exercise were a potent stimulus to increase intramuscular androgen levels in both male and female rats, and E2 in male but not female rats.<sup>63,64</sup> Compared to the acute human trials, the exercising rats' muscles was excised immediately following exercise cessation. Whether temporal discrepancies in post-exercise muscle collection timing between the human and animal studies may explain the divergent findings remain unknown. The interventions also differed between humans and rats, where the latter were all exposed to aerobic exercise, which tends to yield a different molecular signalling

pattern than resistance training.<sup>76</sup> Considering the timeframe of the transient post-exercise elevation in circulating testosterone and the immediate increments in intramuscular sex hormones in rats, future research should consider collecting human biopsies directly following intense exercise.

In contrast to acute exercise interventions, 12 weeks of progressive resistance training led to reductions in intramuscular testosterone, DHEA, and E2 following the intervention in postmenopausal females.<sup>45</sup> In elderly males, chronic resistance training increased intramuscular levels of testosterone, DHT, and DHEA following a similar intervention,<sup>54</sup> whilst androgens remained unchanged in younger males following a resistance training intervention.<sup>39</sup> Given that Sato *et al.*<sup>54</sup> found that ageing led to a reduction in intramuscular sex hormones, and that exercise increased the intramuscular hormone levels in older participants towards levels seen in the younger participants, one could speculate that the lack of effect of resistance exercise on intramuscular sex hormones reported in Morton *et al.*<sup>39</sup> may be as their younger participants already had normal hormone levels, with exercise serving only to restore geriatric losses.

Both chronic exercise studies in rodents used aerobic treadmill running as their interventions.<sup>60,62</sup> Consequently, aerobic exercise caused intramuscular elevations in E2 in the soleus muscle in ovariectomised rats, but not in the plantaris from the same rats nor the gastrocnemius from male rats. Further, whilst DHT increased, DHEA and testosterone remained unchanged in the trained male rats compared to their sedentary counterparts. Studies are yet to measure intramuscular androgens in female rodent models following chronic exercise interventions.

## 5.5 Methodological considerations

At present, the methodology used to measure intramuscular sex hormones may not be sufficiently sensitive for accurate measures, particularly at low hormonal concentrations. Most studies used ELISA/EIA, which can both under or overestimate hormone levels, particularly at low concentrations.<sup>77,78</sup> Compared to immunoassays, liquid chromatography mass spectrometry (LC/MS) yields a significantly lower variability and minimises measurement error in biological fluids.<sup>77</sup> Whether this measurement error at relatively low concentrations is reflected in the muscle remains untested. One can however surmise that it would be similar, as the same pattern is reflected in other matrices such as urine and saliva.<sup>79,80</sup>

To the best of the authors' knowledge, no method has yet been validated to measure intramuscular sex hormones. Hence, there is a need for standardised and validated methodology to ensure valid and reliable measures of the intramuscular sex hormones and facilitate the comparison of findings between studies. Such methodology will likely be based on mass spectrometry, the gold standard of hormonal measurements in other matrices.<sup>81</sup>

## 5.6 Conclusions

Whilst the research field of intramuscular sex hormones present mostly inconclusive and contradictory findings between studies, the possible relationships between skeletal muscle mass and function and intramuscular hormones warrant further investigation, with considerations into age and sex as potential confounding variables.

## 6 Acknowledgements

Séverine Lamon is supported by an Australian Research Council Future Fellowship (FT210100278).

## 7 References

1. Mitchell WK, Williams J, Atherton P, Larvin M, Lund J, Narici M. Sarcopenia, dynapenia, and the impact of advancing age on human skeletal muscle size and strength; a quantitative review. *Front Physiol.* 2012;3:260. doi:10.3389/fphys.2012.00260
2. Xu J, Wan CS, Ktoris K, Reijnierse EM, Maier AB. Sarcopenia Is Associated with Mortality in Adults: A Systematic Review and Meta-Analysis. *Gerontology.* 2021;68(4):361-376. doi:10.1159/000517099
3. Beudart C, Demonceau C, Reginster J-Y, et al. Sarcopenia and health-related quality of life: A systematic review and meta-analysis. *Journal of Cachexia, Sarcopenia and Muscle.* 2023/06/01 2023;14(3):1228-1243. doi:<https://doi.org/10.1002/jcsm.13243>
4. dos Santos L, Cyrino ES, Antunes M, Santos DA, Sardinha LB. Sarcopenia and physical independence in older adults: the independent and synergic role of muscle mass and muscle function. *Journal of Cachexia, Sarcopenia and Muscle.* 2017/04/01 2017;8(2):245-250. doi:<https://doi.org/10.1002/jcsm.12160>
5. Kumar V, Selby A, Rankin D, et al. Age-related differences in the dose-response relationship of muscle protein synthesis to resistance exercise in young and old men. *The Journal of Physiology.* 2009;587(1):211-217. doi:<https://doi.org/10.1113/jphysiol.2008.164483>
6. Moore DR, Churchward-Venne TA, Witard O, et al. Protein ingestion to stimulate myofibrillar protein synthesis requires greater relative protein intakes in

- 522 healthy older versus younger men. *J Gerontol A Biol Sci Med Sci.* Jan  
523 2015;70(1):57-62. doi:10.1093/gerona/glu103
- 524 7. Oliva M, Muñoz-Aguirre M, Kim-Hellmuth S, et al. The impact of sex on gene  
525 expression across human tissues. *Science.* Sep 11  
526 2020;369(6509)doi:10.1126/science.aba3066
- 527 8. Nuzzo JL. Sex differences in skeletal muscle fiber types: A meta-analysis. *Clin*  
528 *Anat.* Jul 10 2023;doi:10.1002/ca.24091
- 529 9. Landen S, Hiam D, Voisin S, Jacques M, Lamon S, Eynon N. Physiological  
530 and molecular sex differences in human skeletal muscle in response to exercise  
531 training. *The Journal of Physiology.* 2023/02/01 2023;601(3):419-434.  
532 doi:<https://doi.org/10.1113/JP279499>
- 533 10. Wüst RCI, Morse CI, De Haan A, Jones DA, Degens H. Sex differences in  
534 contractile properties and fatigue resistance of human skeletal muscle. *Experimental*  
535 *Physiology.* 2008/07/01 2008;93(7):843-850.  
536 doi:<https://doi.org/10.1113/expphysiol.2007.041764>
- 537 11. Kirchengast S, Huber J. Gender and age differences in lean soft tissue mass  
538 and sarcopenia among healthy elderly. *Anthropol Anz.* Jun 2009;67(2):139-51.  
539 doi:10.1127/0003-5548/2009/0018
- 540 12. Suetta C, Haddock B, Alcazar J, et al. The Copenhagen Sarcopenia Study:  
541 lean mass, strength, power, and physical function in a Danish cohort aged 20–93  
542 years. *Journal of Cachexia, Sarcopenia and Muscle.* 2019;10(6):1316-1329.  
543 doi:<https://doi.org/10.1002/jcsm.12477>



- 544 13. Janssen I, Heymsfield SB, Ross R. Low Relative Skeletal Muscle Mass  
545 (Sarcopenia) in Older Persons Is Associated with Functional Impairment and  
546 Physical Disability. *Journal of the American Geriatrics Society*. 2002;50(5):889-896.  
547 doi:<https://doi.org/10.1046/j.1532-5415.2002.50216.x>
- 548 14. de Jong J, Attema BJ, van der Hoek MD, et al. Sex differences in skeletal  
549 muscle-aging trajectory: same processes, but with a different ranking. *Geroscience*.  
550 Feb 23 2023;doi:10.1007/s11357-023-00750-4
- 551 15. Gharpure M, Chen J, Nerella R, et al. Sex-specific alteration in human muscle  
552 transcriptome with age. *GeroScience*. 2023/06/01 2023;45(3):1303-1316.  
553 doi:10.1007/s11357-023-00795-5
- 554 16. Catley MJ, Tomkinson GR. Normative health-related fitness values for  
555 children: analysis of 85347 test results on 9–17-year-old Australians since 1985.  
556 *British Journal of Sports Medicine*. 2013;47(2):98-108. doi:10.1136/bjsports-2011-  
557 090218
- 558 17. Tomkinson GR, Carver KD, Atkinson F, et al. European normative values for  
559 physical fitness in children and adolescents aged 9-17 years: results from 2 779 165  
560 Eurofit performances representing 30 countries. *Br J Sports Med*. Nov  
561 2018;52(22):1445-14563. doi:10.1136/bjsports-2017-098253
- 562 18. Bae YJ, Zeidler R, Baber R, et al. Reference intervals of nine steroid  
563 hormones over the life-span analyzed by LC-MS/MS: Effect of age, gender, puberty,  
564 and oral contraceptives. *The Journal of Steroid Biochemistry and Molecular Biology*.  
565 2019/10/01/ 2019;193:105409. doi:<https://doi.org/10.1016/j.jsbmb.2019.105409>

- 566 19. Handelsman DJ. Sex differences in athletic performance emerge coinciding  
567 with the onset of male puberty. *Clinical Endocrinology*. 2017;87(1):68-72.  
568 doi:<https://doi.org/10.1111/cen.13350>
- 569 20. Alur P. Sex Differences in Nutrition, Growth, and Metabolism in Preterm  
570 Infants. Review. *Frontiers in Pediatrics*. 2019-February-07  
571 2019;7doi:10.3389/fped.2019.00022
- 572 21. Handelsman DJ, Hirschberg AL, Berman S. Circulating Testosterone as the  
573 Hormonal Basis of Sex Differences in Athletic Performance. *Endocrine Reviews*.  
574 2018;39(5):803-829. doi:10.1210/er.2018-00020
- 575 22. Mouser JG, Loprinzi PD, Loenneke JP. The association between physiologic  
576 testosterone levels, lean mass, and fat mass in a nationally representative sample of  
577 men in the United States. *Steroids*. 2016/11/01/ 2016;115:62-66.  
578 doi:<https://doi.org/10.1016/j.steroids.2016.08.009>
- 579 23. Chiu H-T, Shih M-T, Chen W-L. Examining the association between grip  
580 strength and testosterone. *The Aging Male*. 2020/12/04 2020;23(5):915-922.  
581 doi:10.1080/13685538.2019.1632282
- 582 24. Alexander SE, Pollock AC, Lamon S. The effect of sex hormones on skeletal  
583 muscle adaptation in females. *Eur J Sport Sci*. Jul 2022;22(7):1035-1045.  
584 doi:10.1080/17461391.2021.1921854
- 585 25. Bhasin S, Woodhouse L, Casaburi R, et al. Testosterone dose-response  
586 relationships in healthy young men. *Am J Physiol Endocrinol Metab*. Dec  
587 2001;281(6):E1172-81. doi:10.1152/ajpendo.2001.281.6.E1172

26. Hirschberg AL, Elings Knutsson J, Helge T, et al. Effects of moderately increased testosterone concentration on physical performance in young women: a double blind, randomised, placebo controlled study. *Br J Sports Med*. May 2020;54(10):599-604. doi:10.1136/bjsports-2018-100525
27. Horwath O, Apró W, Moberg M, et al. Fiber type-specific hypertrophy and increased capillarization in skeletal muscle following testosterone administration in young women. *J Appl Physiol* (1985). May 1 2020;128(5):1240-1250. doi:10.1152/japplphysiol.00893.2019
28. Storer TW, Magliano L, Woodhouse L, et al. Testosterone Dose-Dependently Increases Maximal Voluntary Strength and Leg Power, but Does Not Affect Fatigability or Specific Tension. *The Journal of Clinical Endocrinology & Metabolism*. 2003;88(4):1478-1485. doi:10.1210/jc.2002-021231
29. Schock H, Zeleniuch-Jacquotte A, Lundin E, et al. Hormone concentrations throughout uncomplicated pregnancies: a longitudinal study. *BMC Pregnancy and Childbirth*. 2016/07/04 2016;16(1):146. doi:10.1186/s12884-016-0937-5
30. Farage MA, Neill S, MacLean AB. Physiological Changes Associated with the Menstrual Cycle: A Review. *Obstetrical & Gynecological Survey*. 2009;64(1)
31. Frederiksen H, Johannsen TH, Andersen SE, et al. Sex-specific Estrogen Levels and Reference Intervals from Infancy to Late Adulthood Determined by LC-MS/MS. *J Clin Endocrinol Metab*. Mar 1 2020;105(3):754-68. doi:10.1210/clinem/dgz196
32. Critchlow AJ, Hiam D, Williams R, Scott D, Lamon S. The role of estrogen in female skeletal muscle aging: A systematic review. *Maturitas*. Sep 7 2023;178:107844. doi:10.1016/j.maturitas.2023.107844

33. Araujo AB, Travison TG, Bhasin S, et al. Association between testosterone and estradiol and age-related decline in physical function in a diverse sample of men. *J Am Geriatr Soc*. Nov 2008;56(11):2000-8. doi:10.1111/j.1532-5415.2008.01965.x
34. van den Beld AW, de Jong FH, Grobbee DE, Pols HAP, Lamberts SWJ. Measures of Bioavailable Serum Testosterone and Estradiol and Their Relationships with Muscle Strength, Bone Density, and Body Composition in Elderly Men\*. *The Journal of Clinical Endocrinology & Metabolism*. 2000;85(9):3276-3282. doi:10.1210/jcem.85.9.6825
35. Staron RS, Karapondo DL, Kraemer WJ, et al. Skeletal muscle adaptations during early phase of heavy-resistance training in men and women. *Journal of Applied Physiology*. 1994/03/01 1994;76(3):1247-1255. doi:10.1152/jappl.1994.76.3.1247
36. Riachy R, McKinney K, Tuvdendorj DR. Various Factors May Modulate the Effect of Exercise on Testosterone Levels in Men. *J Funct Morphol Kinesiol*. Nov 7 2020;5(4)doi:10.3390/jfmk5040081
37. Hakkinen K, Pakarinen A, Alen M, Kauhanen H, Komi PV. Neuromuscular and hormonal adaptations in athletes to strength training in two years. *Journal of Applied Physiology*. 1988/12/01 1988;65(6):2406-2412. doi:10.1152/jappl.1988.65.6.2406
38. Kvorning T, Andersen M, Brixen K, Madsen K. Suppression of endogenous testosterone production attenuates the response to strength training: a randomized, placebo-controlled, and blinded intervention study. *American Journal of Physiology-Endocrinology and Metabolism*. 2006/12/01 2006;291(6):E1325-E1332. doi:10.1152/ajpendo.00143.2006

39. Morton RW, Sato K, Gallagher MPB, et al. Muscle Androgen Receptor Content but Not Systemic Hormones Is Associated With Resistance Training-Induced Skeletal Muscle Hypertrophy in Healthy, Young Men. Original Research. *Frontiers in Physiology*. 2018-October-09 2018;9doi:10.3389/fphys.2018.01373
40. Mitchell CJ, Churchward-Venne TA, Bellamy L, Parise G, Baker SK, Phillips SM. Muscular and Systemic Correlates of Resistance Training-Induced Muscle Hypertrophy. *PLOS ONE*. 2013;8(10):e78636. doi:10.1371/journal.pone.0078636
41. Hatt AA, Kamal M, Mikhail AI, et al. Nuclear-localized androgen receptor content following resistance exercise training is associated with hypertrophy in males but not females. *The FASEB Journal*. 2024/01/31 2024;38(2):e23403. doi:<https://doi.org/10.1096/fj.202301291RR>
42. Alexander SE, Gatto B, Knowles OE, et al. Bioavailable testosterone and androgen receptor activation, but not total testosterone, are associated with muscle mass and strength in females. *J Physiol*. Oct 11 2024;doi:10.1113/jp286803
43. Bunt JC, Bemben DA, Bahr JM. Comparison of estradiol and testosterone levels during and immediately following prolonged exercise in moderately active and trained males and females. *Endocrine Research*. 1987;13(2):157-172. doi:10.3109/07435808709023670
44. Nakamura Y, Aizawa K, Imai T, Kono I, Mesaki N. Hormonal Responses to Resistance Exercise during Different Menstrual Cycle States. *Medicine & Science in Sports & Exercise*. 2011;43(6)
45. Dalgaard LB, Oxfeldt M, Dam TV, Hansen M. Intramuscular sex steroid hormones are reduced after resistance training in postmenopausal women, but not

- 659 affected by estrogen therapy. *Steroids*. 2022/10/01/ 2022;186:109087.  
 660 doi:<https://doi.org/10.1016/j.steroids.2022.109087>
- 661 46. Smith AJ, Phipps WR, Arikawa AY, et al. Effects of Aerobic Exercise on  
 662 Premenopausal Sex Hormone Levels: Results of the WISER Study, a Randomized  
 663 Clinical Trial in Healthy, Sedentary, Eumenorrheic Women. *Cancer Epidemiology,*  
 664 *Biomarkers & Prevention*. 2011;20(6):1098-1106. doi:10.1158/1055-9965.EPI-10-  
 665 1219
- 666 47. HAWKINS VN, FOSTER-SCHUBERT K, CHUBAK J, et al. Effect of Exercise  
 667 on Serum Sex Hormones in Men: A 12-Month Randomized Clinical Trial. *Medicine &*  
 668 *Science in Sports & Exercise*. 2008;40(2):223-233.  
 669 doi:10.1249/mss.0b013e31815bbba9
- 670 48. Ekenros L, Papoutsis Z, Fridén C, Dahlman Wright K, Lindén Hirschberg A.  
 671 Expression of sex steroid hormone receptors in human skeletal muscle during the  
 672 menstrual cycle. *Acta Physiol (Oxf)*. Feb 2017;219(2):486-493.  
 673 doi:10.1111/apha.12757
- 674 49. Wiik A, Ekman M, Johansson O, Jansson E, Esbjörnsson M. Expression of  
 675 both oestrogen receptor alpha and beta in human skeletal muscle tissue.  
 676 *Histochemistry and Cell Biology*. 2009/02/01 2009;131(2):181-189.  
 677 doi:10.1007/s00418-008-0512-x
- 678 50. Barakat R, Oakley O, Kim H, Jin J, Ko CJ. Extra-gonadal sites of estrogen  
 679 biosynthesis and function. *BMB Rep*. Sep 2016;49(9):488-96.  
 680 doi:10.5483/bmbrep.2016.49.9.141
- 681 51. Aizawa K, Iemitsu M, Maeda S, et al. Expression of steroidogenic enzymes  
 682 and synthesis of sex steroid hormones from DHEA in skeletal muscle of rats.

- 683 *American Journal of Physiology-Endocrinology and Metabolism*. 2007/02/01  
684 2007;292(2):E577-E584. doi:10.1152/ajpendo.00367.2006
- 685 52. Sato K, Iemitsu M, Aizawa K, Ajisaka R. Testosterone and DHEA activate the  
686 glucose metabolism-related signaling pathway in skeletal muscle. *American Journal*  
687 *of Physiology-Endocrinology and Metabolism*. 2008/05/01 2008;294(5):E961-E968.  
688 doi:10.1152/ajpendo.00678.2007
- 689 53. Pöllänen E, Sipilä S, Alen M, et al. Differential influence of peripheral and  
690 systemic sex steroids on skeletal muscle quality in pre- and postmenopausal  
691 women. *Aging Cell*. Aug 2011;10(4):650-60. doi:10.1111/j.1474-9726.2011.00701.x
- 692 54. Sato K, Iemitsu M, Matsutani K, Kurihara T, Hamaoka T, Fujita S. Resistance  
693 training restores muscle sex steroid hormone steroidogenesis in older men. *Faseb j*.  
694 Apr 2014;28(4):1891-7. doi:10.1096/fj.13-245480
- 695 55. Covidence systematic review software. Veritas Health Innovation.  
696 [www.covidence.org](http://www.covidence.org)
- 697 56. Tufanaru C, Munn Z, Aromataris E, Campbell J, Hopp L. Chapter 3:  
698 Systematic reviews of effectiveness. *JB I Manual for Evidence Synthesis*. 2020:chap  
699 3. <https://synthesismanual.jbi.global>
- 700 57. Moola S, Munn Z, Tufanaru C, et al. Chapter 7: Systematic reviews of etiology  
701 and risk. *JB I Manual for Evidence Synthesis*. 2020:chap 7.  
702 <https://synthesismanual.jbi.global>
- 703 58. Hooijmans CR, Rovers MM, de Vries RB, Leenaars M, Ritskes-Hoitinga M,  
704 Langendam MW. SYRCLE's risk of bias tool for animal studies. *BMC Med Res*  
705 *Methodol*. Mar 26 2014;14:43. doi:10.1186/1471-2288-14-43

59. Pöllänen E, Kangas R, Horttanainen M, et al. Intramuscular sex steroid hormones are associated with skeletal muscle strength and power in women with different hormonal status. *Aging Cell*. Apr 2015;14(2):236-48. doi:10.1111/accel.12309
60. Aizawa K, Iemitsu M, Maeda S, Mesaki N, Ushida T, Akimoto T. Endurance exercise training enhances local sex steroidogenesis in skeletal muscle. *Med Sci Sports Exerc*. Nov 2011;43(11):2072-80. doi:10.1249/MSS.0b013e31821e9d74
61. Feng Y, Wu J, Cheng Z, Zhang J, Lu J, Shi R. Mechanical stretch enhances sex steroidogenesis in C(2)C(12) skeletal muscle cells. *Steroids*. Oct 2019;150:108434. doi:10.1016/j.steroids.2019.108434
62. Shi R, Tian X, Feng Y, et al. Expression of aromatase and synthesis of sex steroid hormones in skeletal muscle following exercise training in ovariectomized rats. *Steroids*. Mar 2019;143:91-96. doi:10.1016/j.steroids.2019.01.003
63. Aizawa K, Iemitsu M, Maeda S, et al. Acute exercise activates local bioactive androgen metabolism in skeletal muscle. *Steroids*. Mar 2010;75(3):219-23. doi:10.1016/j.steroids.2009.12.002
64. Aizawa K, Iemitsu M, Otsuki T, Maeda S, Miyauchi T, Mesaki N. Sex differences in steroidogenesis in skeletal muscle following a single bout of exercise in rats. *J Appl Physiol* (1985). Jan 2008;104(1):67-74. doi:10.1152/japplphysiol.00558.2007
65. Cardaci TD, Machek SB, Wilburn DT, Heilesen JL, Willoughby DS. High-Load Resistance Exercise Augments Androgen Receptor–DNA Binding and Wnt/ $\beta$ -Catenin Signaling without Increases in Serum/Muscle Androgens or Androgen Receptor Content. *Nutrients*. 2020;12(12):3829.



66. Haines M, McKinley-Barnard SK, Andre TL, Gann JJ, Hwang PS, Willoughby DS. Skeletal Muscle Estrogen Receptor Activation in Response to Eccentric Exercise Up-Regulates Myogenic-Related Gene Expression Independent of Differing Serum Estradiol Levels Occurring during the Human Menstrual Cycle. *J Sports Sci Med*. Mar 2018;17(1):31-39.
67. Vechin FC, Vingren JL, Telles GD, et al. Acute changes in serum and skeletal muscle steroids in resistance-trained men. *Front Endocrinol (Lausanne)*. 2023;14:1081056. doi:10.3389/fendo.2023.1081056
68. Vingren JL, Kraemer WJ, Hatfield DL, et al. Effect of resistance exercise on muscle steroidogenesis. *J Appl Physiol (1985)*. Dec 2008;105(6):1754-60. doi:10.1152/jappphysiol.91235.2008
69. Son B-K, Eto M, Oura M, et al. Low-Intensity Exercise Suppresses CCAAT/Enhancer-Binding Protein  $\delta$ /Myostatin Pathway Through Androgen Receptor in Muscle Cells. *Gerontology*. 2019;65(4):397-406. doi:10.1159/000499826
70. Zhao H, Tian Z, Hao J, Chen B. Extragonadal aromatization increases with time after ovariectomy in rats. *Reprod Biol Endocrinol*. Jan 21 2005;3:6. doi:10.1186/1477-7827-3-6
71. Bekaert M, Van Nieuwenhove Y, Calders P, et al. Determinants of testosterone levels in human male obesity. *Endocrine*. 2015/09/01 2015;50(1):202-211. doi:10.1007/s12020-015-0563-4
72. Misso ML, Jang C, Adams J, et al. Adipose aromatase gene expression is greater in older women and is unaffected by postmenopausal estrogen therapy. *Menopause*. 2005;12(2)

73. Abildgaard J, Danielsen ER, Dorph E, et al. Ectopic Lipid Deposition Is Associated With Insulin Resistance in Postmenopausal Women. *The Journal of Clinical Endocrinology & Metabolism*. 2018;103(9):3394-3404. doi:10.1210/jc.2018-00554
74. Schuppe ER, Tobiansky D, Goller F, Fuxjager MJ. Specialized androgen synthesis in skeletal muscles that actuate elaborate social displays. *Journal of Experimental Biology*. 2022;225(12):jeb243730. doi:10.1242/jeb.243730
75. D'Andrea S, Spaggiari G, Barbonetti A, Santi D. Endogenous transient doping: physical exercise acutely increases testosterone levels—results from a meta-analysis. *Journal of Endocrinological Investigation*. 2020/10/01 2020;43(10):1349-1371. doi:10.1007/s40618-020-01251-3
76. Dickinson JM, D'Lugos AC, Naymik MA, et al. Transcriptome response of human skeletal muscle to divergent exercise stimuli. *Journal of Applied Physiology*. 2018/06/01 2018;124(6):1529-1540. doi:10.1152/japplphysiol.00014.2018
77. Ankarberg-Lindgren C, Becker C, Svala E, Ryberg H. Methodological considerations in determining sex steroids in children: comparison of conventional immunoassays with liquid chromatography-tandem mass spectrometry. *Clinical Chemistry and Laboratory Medicine (CCLM)*. 2024;62(1):85-96. doi:doi:10.1515/cclm-2023-0344
78. Aydin S. A short history, principles, and types of ELISA, and our laboratory experience with peptide/protein analyses using ELISA. *Peptides*. 2015/10/01/ 2015;72:4-15. doi:<https://doi.org/10.1016/j.peptides.2015.04.012>
79. Faupel-Badger JM, Fuhrman BJ, Xu X, et al. Comparison of Liquid Chromatography-Tandem Mass Spectrometry, RIA, and ELISA Methods for

776 Measurement of Urinary Estrogens. *Cancer Epidemiology, Biomarkers & Prevention*.  
777 2010;19(1):292-300. doi:10.1158/1055-9965.EPI-09-0643

778 80. Welker KM, Lassetter B, Brandes CM, Prasad S, Koop DR, Mehta PH. A  
779 comparison of salivary testosterone measurement using immunoassays and tandem  
780 mass spectrometry. *Psychoneuroendocrinology*. 2016/09/01/ 2016;71:180-188.  
781 doi:<https://doi.org/10.1016/j.psyneuen.2016.05.022>

782 81. Conklin SE, Knezevic CE. Advancements in the gold standard: Measuring  
783 steroid sex hormones by mass spectrometry. *Clinical Biochemistry*. 2020/08/01/  
784 2020;82:21-32. doi:<https://doi.org/10.1016/j.clinbiochem.2020.03.008>

785

## 8 Figures and Tables

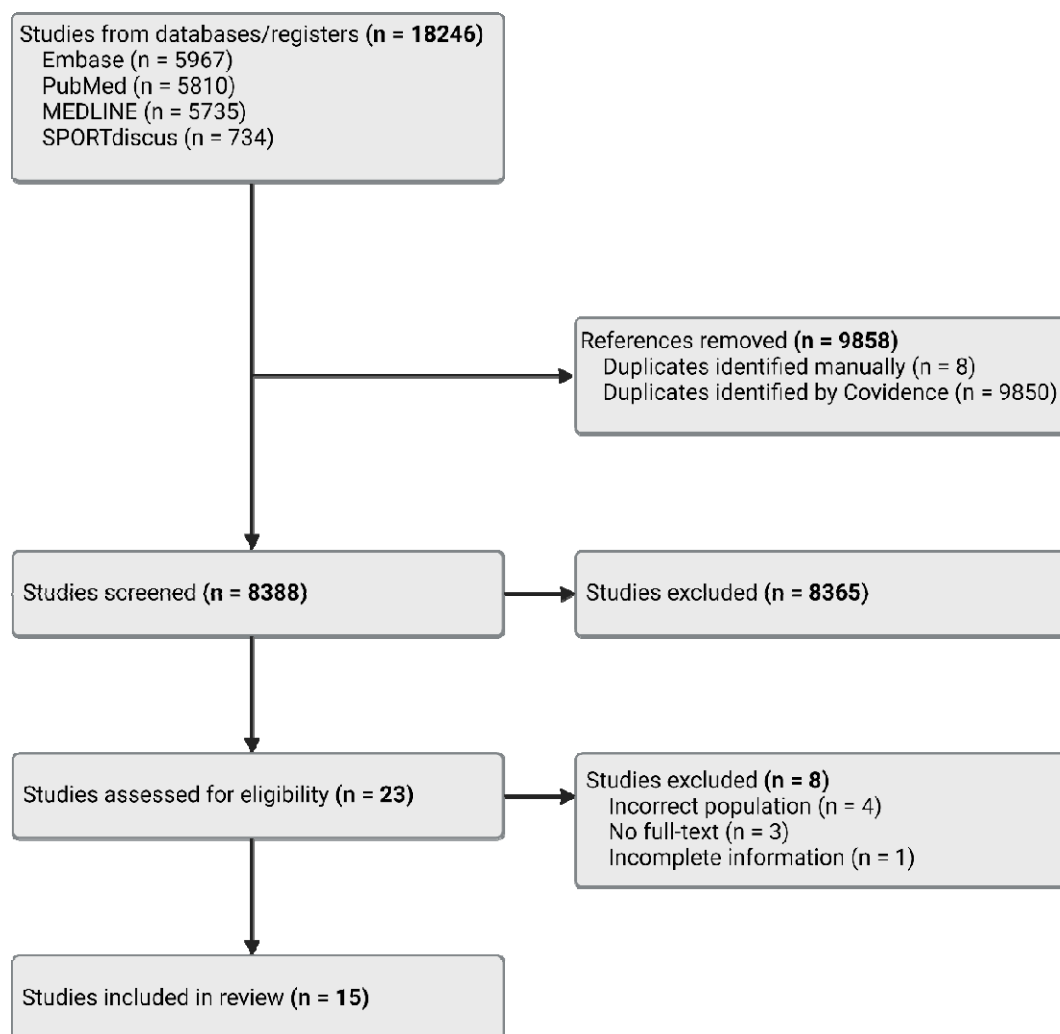

**Figure 1.** PRISMA diagram outlining the systematic review search and assessment.

**Table 1.** Studies investigating how intramuscular sex hormones vary across the lifespan

| Study                                       | Study type      | Participants                                                                                 | Methods                                                                                                   | Intramuscular hormones       | Intramuscular enzymes                                                              | Key findings (older compared to younger controls)                                                                                  |
|---------------------------------------------|-----------------|----------------------------------------------------------------------------------------------|-----------------------------------------------------------------------------------------------------------|------------------------------|------------------------------------------------------------------------------------|------------------------------------------------------------------------------------------------------------------------------------|
| Pöllänen <i>et al.</i> (2015) <sup>59</sup> | Cross-sectional | 8 premenopausal females (32 ± 2 years old),<br>8 postmenopausal females (58 ± 2 years old)   | Intramuscular hormones measured via ELISA.                                                                | E2, DHEA, DHT, testosterone  |                                                                                    | ↔ E2<br>↔ DHEA<br>↑ DHT<br>↔ Testosterone                                                                                          |
| Pöllänen <i>et al.</i> (2011) <sup>53</sup> | Cross-sectional | 13 premenopausal females (33 ± 2 years old),<br>13 postmenopausal females (64 ± 2 years old) | Intramuscular hormones were measured via ELISA. Intramuscular enzymes were measured via quantitative PCR. | E2, DHEA, DHT, testosterone  | <b>mRNA</b><br>3β-HSD, 5α-reductase type 1, 5α-reductase type 2, 17β-HSD, P450arom | ↑ E2<br>↔ DHEA<br>↔ DHT<br>↑ Testosterone<br>↑ P450arom<br>↑ 3β-HSD<br>↔ 5α-reductase type 1<br>↔ 5α-reductase type 2<br>↔ 17β-HSD |
| Sato <i>et al.</i> (2014) <sup>54</sup>     | Cross-sectional | 6 young males (24.3 ± 1.3 years old),<br>13 old males (67.2 ± 1.8 years old)                 | Intramuscular hormones were measured via EIA. Intramuscular enzymes were measured via western blotting.   | DHEA, DHT, Free testosterone | <b>Protein</b><br>3β-HSD, 5α-reductase, 17β-HSD                                    | ↓ DHEA<br>↓ DHT<br>↓ Free testosterone<br>↓ 3β-HSD<br>↓ 5α-reductase<br>↓ 17β-HSD                                                  |

3β-HSD, 3-beta-hydroxysteroid dehydrogenase; 17β-HSD, 17-beta-hydroxysteroid dehydrogenase; DHEA, dehydroepiandrosterone; DHT, dihydrotestosterone; E2, oestradiol; ELISA, enzyme linked immunosorbent assay; EIA, Enzyme immunoassay; P450arom, aromatase cytochrome P-450; PCR, polymerase chain reaction. ↑ significant increase, ↓ significant decrease, ↔ no significant difference.

**Table 2.** Studies investigating the relationship between intramuscular hormones and muscle mass and function

| Study                                       | Participants                                     | Exercise type | Intervention                                                                                                                                                                                                                                                                                            | Intramuscular hormones                               | Intramuscular enzymes                                                                                 | Key findings                                                                                                                                                                                                                                                                                                                                                                                                                                                                                                                                                                                                                                                                                                                                                                                                                                                                                                                                                                                                                                                                                                                                                                                                                                                                                                                                                                                  |
|---------------------------------------------|--------------------------------------------------|---------------|---------------------------------------------------------------------------------------------------------------------------------------------------------------------------------------------------------------------------------------------------------------------------------------------------------|------------------------------------------------------|-------------------------------------------------------------------------------------------------------|-----------------------------------------------------------------------------------------------------------------------------------------------------------------------------------------------------------------------------------------------------------------------------------------------------------------------------------------------------------------------------------------------------------------------------------------------------------------------------------------------------------------------------------------------------------------------------------------------------------------------------------------------------------------------------------------------------------------------------------------------------------------------------------------------------------------------------------------------------------------------------------------------------------------------------------------------------------------------------------------------------------------------------------------------------------------------------------------------------------------------------------------------------------------------------------------------------------------------------------------------------------------------------------------------------------------------------------------------------------------------------------------------|
| Aizawa <i>et al.</i> (2011) <sup>60</sup>   | 11 male Sprague Dawley rats (10 weeks old)       | Chronic AE    | <b>Intervention group</b> (n=5): 12 weeks of motorised treadmill running 5 d w <sup>-1</sup> at 30 m·min <sup>-1</sup> , for 30 min which increased to 60 m·min <sup>-1</sup> and was thereafter maintained. <b>Control group</b> (n=6): were confined to their cages but handled 5 d w <sup>-1</sup> . | E2, DHEA, DHT, Free testosterone, Total testosterone | <b>mRNA:</b> 3β-HSD, 5α-reductase, 17β-HSD, P450arom. <b>Protein:</b> 5α-reductase, 17β-HSD, P450arom | GC mass/BW & DHT level: r=0.41, p=0.05<br><br>GC mass/BW was not correlated to the levels of intramuscular DHEA, free testosterone, total testosterone, and E2                                                                                                                                                                                                                                                                                                                                                                                                                                                                                                                                                                                                                                                                                                                                                                                                                                                                                                                                                                                                                                                                                                                                                                                                                                |
| Dalgaard <i>et al.</i> (2022) <sup>45</sup> | 10 postmenopausal females (54.6 ± 3.8 years old) | Chronic RE    | Progressive RE including leg press, knee extension, triceps extension, sit-ups, and back extension. Acute, one session. Chronic, 3d·week <sup>-1</sup> for 12 weeks.                                                                                                                                    | DHEA, E2, Testosterone                               | -                                                                                                     | <b>Cross-sectional data at baseline</b><br>E2 R <sup>2</sup> <0.18, p>0.11 for muscle CSA, LBM, MVCex, MVCflex, CMJ, and muscle quality.<br><br>Testosterone R <sup>2</sup> <0.14, p>0.15 for muscle CSA, LBM, MVCex, MVCflex, CMJ, and muscle quality.<br><br>DHEA vs. LBM R <sup>2</sup> =0.52, p=0.004 (negative association)<br>DHEA vs. muscle CSA R <sup>2</sup> =0.34, p=0.027 (negative association)<br>DHEA R <sup>2</sup> ≤0.18, p≥0.13 for MVCex, MVCflex, CMJ, and muscle quality.<br><br><b>Δ IM hormone vs. Δ muscle mass/strength across the intervention</b><br>E2 vs. muscle quality R <sup>2</sup> =0.378, p=0.044 (the better maintainance of E2 the greater improvement in quality)<br>E2 R <sup>2</sup> ≤0.299, p≥0.082 for muscle CSA, LBM, MVCex, MVCflex, and CMJ.<br><br>Testosterone vs. MVCex R <sup>2</sup> =0.389, p=0.040 (the better maintainance of testosterone the greater improvement in MVCex)<br>Testosterone vs. muscle quality R <sup>2</sup> =0.422, p=0.031 (the better maintainance of testosterone the greater improvement in quality)<br>Testosterone R <sup>2</sup> ≤0.296, p≥0.084 for muscle CSA, LBM, MVCflex, and CMJ.<br><br>DHEA vs. MVCex R <sup>2</sup> =0.453, p=0.023 (the better maintainance of DHEA the greater improvement in MVCex)<br>DHEA R <sup>2</sup> ≤0.257, p≥0.111 for muscle CSA, LBM, MVCflex, CMJ, and muscle quality. |
| Feng <i>et al.</i> (2019) <sup>61</sup>     | C2C12 cells                                      | Acute stretch | Muscle cells were mechanically stretched at for 8h at 0.5Hz and 10% amplitude.                                                                                                                                                                                                                          | E2                                                   | <b>mRNA:</b> 3β-HSD, 17β-HSD, P450arom. <b>Protein:</b> 3β-HSD, 17β-HSD, P450arom.                    | <b>E2 concentration and cell proliferation index</b><br>r <sub>s</sub> =0.758, p<0.011.                                                                                                                                                                                                                                                                                                                                                                                                                                                                                                                                                                                                                                                                                                                                                                                                                                                                                                                                                                                                                                                                                                                                                                                                                                                                                                       |

|                                                                                                                 |                                                                                                                                                                                 |            |                                                                                                                                                                                                                                                                                                                                                                                                                                                       |                         |                                                                         |                                                                                                                                                                                                                                                                                                                                                                                                                                                                                                                                                                               |
|-----------------------------------------------------------------------------------------------------------------|---------------------------------------------------------------------------------------------------------------------------------------------------------------------------------|------------|-------------------------------------------------------------------------------------------------------------------------------------------------------------------------------------------------------------------------------------------------------------------------------------------------------------------------------------------------------------------------------------------------------------------------------------------------------|-------------------------|-------------------------------------------------------------------------|-------------------------------------------------------------------------------------------------------------------------------------------------------------------------------------------------------------------------------------------------------------------------------------------------------------------------------------------------------------------------------------------------------------------------------------------------------------------------------------------------------------------------------------------------------------------------------|
|                                                                                                                 |                                                                                                                                                                                 |            |                                                                                                                                                                                                                                                                                                                                                                                                                                                       |                         |                                                                         | <u><b>Baseline IM hormone/enzyme vs. <math>\Delta</math> fibre CSA and <math>\Delta</math> lean body mass</b></u><br>Free testosterone vs. TI CSA $r=-0.16$ , $p>0.05$<br>Free testosterone vs. TII CSA $r=-0.04$ , $p>0.05$<br>Free testosterone vs. LBM $r=-0.33$ , $p>0.05$<br>DHT vs. TI CSA $r=-0.23$ , $p>0.05$<br>DHT vs. TII CSA $r=-0.20$ , $p>0.05$<br>DHT vs. LBM $r=-0.23$ , $p>0.05$<br>5 $\alpha$ -reductase vs. TI CSA $r=-0.33$ , $p>0.05$<br>5 $\alpha$ -reductase vs. TII CSA $r=-0.43$ , $p>0.05$<br>5 $\alpha$ -reductase vs. LBM $r=0.24$ , $p>0.05$     |
| Morton <i>et al.</i> (2018) <sup>39</sup>                                                                       | 56 younger males (23 $\pm$ 2 years old).<br><br>Data presented is a subgroup analysis (n=20) from the highest (n=10) and lowest (n=10) responders to the exercise intervention. | Chronic RE | Participants were randomised into either LR or HR. <b>HR</b> : 3 sets of 20-25 repetitions at 30-50%1RM to volitional failure. <b>LR</b> : 3 sets of 8-12 repetitions at 75-90%1RM to volitional failure. Both conditions trained 4d week <sup>-1</sup> for 12 weeks, and the program included: leg press, seated row, bench press, hamstring curl, planks, shoulder press, bicep curls, tricep extensions, wide-grip pull downs, and knee extension. | DHT, Testosterone       | <b>Protein</b> : 5 $\alpha$ -reductase                                  | <u><b>Outcome IM hormone/enzyme vs. <math>\Delta</math> fibre CSA and <math>\Delta</math> lean body mass</b></u><br>Free testosterone vs. TI CSA $r=-0.15$ , $p>0.05$<br>Free testosterone vs. TII CSA $r=0.02$ , $p>0.05$<br>Free testosterone vs. LBM $r=-0.36$ , $p>0.05$<br>DHT vs. TI CSA $r=0.13$ , $p>0.05$<br>DHT vs. TII CSA $r=0.21$ , $p>0.05$<br>DHT vs. LBM $r=-0.22$ , $p>0.05$<br>5 $\alpha$ -reductase vs. TI CSA $r=-0.04$ , $p>0.05$<br>5 $\alpha$ -reductase vs. TII CSA $r=-0.06$ , $p>0.05$<br>5 $\alpha$ -reductase vs. LBM $r=0.43$ , $p>0.05$         |
|                                                                                                                 |                                                                                                                                                                                 |            |                                                                                                                                                                                                                                                                                                                                                                                                                                                       |                         |                                                                         | <u><b><math>\Delta</math> IM hormone/enzyme vs. <math>\Delta</math> fibre CSA and <math>\Delta</math> lean body mass</b></u><br>Free testosterone vs. TI CSA $r=-0.03$ , $p>0.05$<br>Free testosterone vs. TII CSA $r=0.05$ , $p>0.05$<br>Free testosterone vs. LBM $r=0.10$ , $p>0.05$<br>DHT vs. TI CSA $r=0.27$ , $p>0.05$<br>DHT vs. TII CSA $r=0.30$ , $p>0.05$<br>DHT vs. LBM $r=0.05$ , $p>0.05$<br>5 $\alpha$ -reductase vs. TI CSA $r=0.24$ , $p>0.05$<br>5 $\alpha$ -reductase vs. TII CSA $r=0.29$ , $p>0.05$<br>5 $\alpha$ -reductase vs. LBM $r=0.30$ , $p>0.05$ |
| <i>Associations below have been calculated as percentage changes in variables over the intervention period.</i> |                                                                                                                                                                                 |            |                                                                                                                                                                                                                                                                                                                                                                                                                                                       |                         |                                                                         |                                                                                                                                                                                                                                                                                                                                                                                                                                                                                                                                                                               |
| Sato <i>et al.</i> (2014) <sup>54</sup>                                                                         | 13 older males (67.2 $\pm$ 1.8 years old)                                                                                                                                       | Chronic RE | 3 sets of 10 repetitions of leg extension and leg flexion at 70% of 1RM, 3d week <sup>-1</sup> for 12 weeks.                                                                                                                                                                                                                                                                                                                                          | DHEA, DHT, Testosterone | <b>Protein</b> : 3 $\beta$ -HSD, 17 $\beta$ -HSD, 5 $\alpha$ -reductase | <u><b>[IM hormone] vs. Isokinetic strength</b></u><br>DHEA $r=0.493$ , $p=0.034$<br>DHT $r=0.617$ , $p<0.001$<br>Free testosterone $r=0.532$ , $p<0.001$                                                                                                                                                                                                                                                                                                                                                                                                                      |
|                                                                                                                 |                                                                                                                                                                                 |            |                                                                                                                                                                                                                                                                                                                                                                                                                                                       |                         |                                                                         | <u><b>[IM hormone] vs. Muscle CSA</b></u><br>DHEA $r=0.413$ , $p=0.078$<br>DHT $r=0.521$ , $p<0.001$<br>Free testosterone $r=0.515$ , $p=0.002$                                                                                                                                                                                                                                                                                                                                                                                                                               |

|                                             |                                                                                              |            |                                                                                                                                                                                                                                                                                                 |                             |                                                                                                          |                                                                                                                                                                                                                                                                                                                                                                                                                                                                                                                                                |
|---------------------------------------------|----------------------------------------------------------------------------------------------|------------|-------------------------------------------------------------------------------------------------------------------------------------------------------------------------------------------------------------------------------------------------------------------------------------------------|-----------------------------|----------------------------------------------------------------------------------------------------------|------------------------------------------------------------------------------------------------------------------------------------------------------------------------------------------------------------------------------------------------------------------------------------------------------------------------------------------------------------------------------------------------------------------------------------------------------------------------------------------------------------------------------------------------|
| Shi <i>et al.</i> (2019) <sup>62</sup>      | 14 ovariectomised female Sprague Dawley rats (12 weeks old)                                  | Chronic AE | <b>Intervention:</b> 5 weeks of motorised treadmill running 6d week <sup>-1</sup> . During the first week, speed and duration were progressively increased to 60min, 20m/min, which was maintain for the intervention period.<br><b>Control:</b> Same procedures but treadmill was not started. | E2                          | <b>Protein:</b> P450arom                                                                                 | Soleus mass vs. E2 levels $r=0.65$ , $p<0.05$                                                                                                                                                                                                                                                                                                                                                                                                                                                                                                  |
| Pöllänen <i>et al.</i> (2015) <sup>59</sup> | 8 premenopausal females (32 ± 2 years old),<br>8 postmenopausal females (58 ± 2 years old)   | -          | No intervention (cross-sectional study)                                                                                                                                                                                                                                                         | E2, DHEA, DHT, testosterone |                                                                                                          | <b>[IM hormone] vs. Muscle strength (knee extensor)</b><br>E2 $R^2=0.392$ , $p=0.013$ (positive association)<br>Testosterone $R^2=0.438$ , $p=0.007$ (positive association)<br>DHT $R^2=0.008$ , $p=0.747$<br>DHEA $R^2=0.348$ , $p=0.021$ (positive association)<br><br><b>[IM hormone] vs. Muscle power (vertical jump height)</b><br>E2 $R^2=0.469$ , $p=0.005$ (positive association)<br>Testosterone $R^2=0.370$ , $p=0.016$ (positive association)<br>DHT $R^2=0.033$ , $p=0.520$<br>DHEA $R^2=0.390$ , $p=0.013$ (positive association) |
| Pöllänen <i>et al.</i> (2011) <sup>53</sup> | 13 premenopausal females (33 ± 2 years old),<br>13 postmenopausal females (64 ± 2 years old) | -          | No intervention (cross-sectional study)                                                                                                                                                                                                                                                         | DHEA, DHT, E2, testosterone | <b>mRNA:</b> 3 $\beta$ -HSD, 5 $\alpha$ -reductase type 1, 5 $\alpha$ -reductase type 2, 17 $\beta$ -HSD | <b>[IM hormone] vs. Muscle force per CSA</b><br>DHEA $r=0.228$ , $p=0.273$<br>DHT $r=-0.130$ , $p=0.537$<br>E2 $r=-0.142$ , $p=0.499$<br>Testosterone $r=-0.050$ , $p=0.811$<br><br><b>[IM hormone] vs. QF attenuation</b><br>DHEA $r=-0.381$ , $p=0.060$<br>DHT $r=-0.337$ , $p=0.099$<br>E2 $r=-0.469$ , $p=0.018$<br>Testosterone $r=-0.573$ , $p=0.003$                                                                                                                                                                                    |

3 $\beta$ -HSD, 3-beta-hydroxysteroid dehydrogenase; 17 $\beta$ -HSD, 17-beta-hydroxysteroid dehydrogenase; AE, aerobic exercise; BW, body weight; CMJ, counter movement jump; CSA, cross sectional area; DHEA, dehydroepiandrosterone; DHT, dihydrotestosterone; E2, oestradiol; GC, gastrocnemius; HR, high repetition; IM, intramuscular; LBM, lean body mass; LR, low repetition; MVCex, maximal voluntary contraction extension; MVCflex, maximal voluntary contraction flexion; P450arom, aromatase cytochrome P-450; QF, quadriceps femoris; RE, resistance exercise.



**Table 3.** Studies investigating the relationship between exercise and intramuscular sex hormone biosynthesis

| Study                                     | Subjects                                                 | Intervention | Exercise protocol                                                                                                                                                                                                                                                                                                                   | Methods                                                                                         | Intramuscular hormones                               | Intramuscular enzymes                                                                                 | Key findings (compared to controls or pre-test)                                                                                                                                                                                              |
|-------------------------------------------|----------------------------------------------------------|--------------|-------------------------------------------------------------------------------------------------------------------------------------------------------------------------------------------------------------------------------------------------------------------------------------------------------------------------------------|-------------------------------------------------------------------------------------------------|------------------------------------------------------|-------------------------------------------------------------------------------------------------------|----------------------------------------------------------------------------------------------------------------------------------------------------------------------------------------------------------------------------------------------|
| Aizawa <i>et al.</i> (2011) <sup>60</sup> | 11 male Sprague Dawley rats (10 weeks old)               | Chronic AE   | <b>Intervention group</b> (n=5): 12 weeks of motorised treadmill running 5 d·w <sup>-1</sup> at 30 m·min <sup>-1</sup> , for 30 min which increased to 60 m·min <sup>-1</sup> , for 30 min during week and was thereafter maintained.<br><b>Control group</b> (n=6): were confined to their cages but handled 5 d·w <sup>-1</sup> . | Gastrocnemius was excised 48h after the final session. IM sex hormones were measured via EIA.   | E2, DHEA, DHT, Free testosterone, Total testosterone | <b>mRNA:</b> 3β-HSD, 5α-reductase, 17β-HSD, P450arom. <b>Protein:</b> 5α-reductase, 17β-HSD, P450arom | ↔ E2<br>↔ DHEA<br>↔ Free testosterone<br>↔ Total testosterone<br>↑ DHT<br>↑ 3β-HSD mRNA<br>↑ 5α-reductase mRNA, ↑ 5α-reductase protein<br>↔ 17β-HSD mRNA, ↔ 17β-HSD protein<br>↑ P450arom mRNA, ↑ P450arom protein                           |
| Aizawa <i>et al.</i> (2010) <sup>63</sup> | 16 male and 16 female Sprague Dawley rats (10 weeks old) | Acute AE     | <b>Intervention group</b> (n=16): motorised treadmill running 30 m·min <sup>-1</sup> , for 30 min.<br><b>Control group</b> (n=16): remained at rest for 30 min on a stopped treadmill.                                                                                                                                              | Gastrocnemius was excised immediately after the session. IM sex hormones were measured via EIA. | DHEA, DHT, Free testosterone                         | <b>mRNA:</b> 5α-reductase type 1. <b>Protein:</b> 5α-reductase type 1                                 | <b>Males</b><br>↑ DHEA<br>↑ DHT<br>↑ Free testosterone<br>↔ 5α-reductase type 1 mRNA, ↑ 5α-reductase type 1 protein<br><b>Females</b><br>↑ DHEA<br>↑ DHT<br>↑ Free testosterone<br>↑ 5α-reductase type 1 mRNA, ↑ 5α-reductase type 1 protein |

|                                             |                                                          |                        |                                                                                                                                                                                                         |                                                                                                                                                                                    |                        |                                                                                          |                                                                                                                                                                                                                                                                                                   |
|---------------------------------------------|----------------------------------------------------------|------------------------|---------------------------------------------------------------------------------------------------------------------------------------------------------------------------------------------------------|------------------------------------------------------------------------------------------------------------------------------------------------------------------------------------|------------------------|------------------------------------------------------------------------------------------|---------------------------------------------------------------------------------------------------------------------------------------------------------------------------------------------------------------------------------------------------------------------------------------------------|
| Aizawa <i>et al.</i> (2008) <sup>64</sup>   | 16 male and 16 female Sprague Dawley rats (10 weeks old) | Acute AE               | <p><b>Intervention group</b><br/>(n=16): motorised treadmill running 30 m·min<sup>-1</sup>, for 30 min.</p> <p><b>Control group</b><br/>(n=16): remained at rest for 30 min on a stopped treadmill.</p> | Gastrocnemius was excised immediately after the session. IM sex hormones were measured via EIA.                                                                                    | E2, Testosterone       | <p><b>mRNA:</b> 3β-HSD, 17β-HSD, P450arom.</p> <p><b>Protein:</b> 17β-HSD, P450arom.</p> | <p><b>Males</b><br/>↑ E2<br/>↑ Testosterone<br/>↑ 3β-HSD mRNA<br/>↔ 17β-HSD mRNA, ↑ 17β-HSD protein<br/>↑ P450arom mRNA, ↑ P450arom protein</p> <p><b>Females</b><br/>↔ E2<br/>↑ Testosterone<br/>↔ 3β-HSD mRNA<br/>↑ 17β-HSD mRNA, ↑ 17β-HSD protein<br/>↓ P450arom mRNA, ↓ P450arom protein</p> |
| Cardaci <i>et al.</i> (2020) <sup>65</sup>  | 10 males (23.2 ± 4.68 years old)                         | Acute RE               | Full body RE including 3 sets of bench press, leg press, lat pulldown, and leg extension at 80% of 1RM (HL) and 50% of 1RM (LL) to volitional failure in different sessions.                            | VL biopsies were taken pre, 3h and 24h post the session. IM sex hormones were measured via ELISA.                                                                                  | DHT, Testosterone      | -                                                                                        | <p><b>3h post exercise</b><br/>↔ DHT (HL), ↔ DHT (LL)<br/>↔ Testosterone (HL), ↔ Testosterone (LL)</p> <p><b>24h post exercise</b><br/>↔ DHT (HL), ↔ DHT (LL)<br/>↔ Testosterone (HL), ↔ Testosterone (LL)</p>                                                                                    |
| Dalgaard <i>et al.</i> (2022) <sup>45</sup> | 10 postmenopausal females (54.6 ± 3.8 years old)         | Acute RE<br>Chronic RE | Progressive RE including leg press, knee extension, triceps extension, sit-ups, and back extension. Acute, one session. Chronic, 3d·week <sup>-1</sup> for 12 weeks.                                    | VL biopsy taken pre intervention, and pre (>72h since last session) and 1-2 h post the final session (acute) of the chronic intervention. IM sex hormones were measured via ELISA. | DHEA, E2, Testosterone | -                                                                                        | <p><b>Acute</b><br/>↔ DHEA<br/>↔ E2<br/>↔ Testosterone</p> <p><b>Chronic</b><br/>↓ DHEA<br/>↓ E2<br/>↓ Testosterone</p>                                                                                                                                                                           |

|                                           |                                                    |               |                                                                                                                                                                                                                     |                                                                                                             |    |                                                                                                                                                                                                                                                                                                                                                                                                                                                                                                          |
|-------------------------------------------|----------------------------------------------------|---------------|---------------------------------------------------------------------------------------------------------------------------------------------------------------------------------------------------------------------|-------------------------------------------------------------------------------------------------------------|----|----------------------------------------------------------------------------------------------------------------------------------------------------------------------------------------------------------------------------------------------------------------------------------------------------------------------------------------------------------------------------------------------------------------------------------------------------------------------------------------------------------|
| Feng <i>et al.</i> (2019) <sup>61</sup>   | C2C12 cells                                        | Acute stretch | Cells were mechanically stretched at for 8h at 0.5Hz and 10% amplitude.                                                                                                                                             | C2C12 cells were harvested 24h after the stretch intervention. IM sex hormones were measured via ELISA.     | E2 | <p><b>mRNA:</b> 3<math>\beta</math>-HSD, 17<math>\beta</math>-HSD, P450arom. <math>\uparrow</math> E2</p> <p><b>Protein:</b> 3<math>\beta</math>-HSD, 17<math>\beta</math>-HSD, P450arom. <math>\uparrow</math> 3<math>\beta</math>-HSD mRNA, <math>\uparrow</math> 3<math>\beta</math>-HSD protein, <math>\uparrow</math> 17<math>\beta</math>-HSD mRNA, <math>\uparrow</math> 17<math>\beta</math>-HSD protein, <math>\uparrow</math> P450arom mRNA, <math>\leftrightarrow</math> P450arom protein</p> |
| Haines <i>et al.</i> (2018) <sup>66</sup> | 22 eumenorrheic females (20.9 $\pm$ 1.4 years old) | Acute RE      | 10 sets of 10 repetitions of unilateral, eccentric leg extension at an isokinetic speed of 30°/second. Protocol conducted once during the MF phase and ML phase, day 6 and 21 of the menstrual cycle, respectively. | VL biopsies were obtained pre, 6h post, and 24h post each session. IM sex hormones were measured via ELISA. | E2 | <p><b>6h post exercise</b></p> <p><math>\leftrightarrow</math> E2 (MF)</p> <p><math>\leftrightarrow</math> E2 (ML)</p> <p><b>24h post exercise</b></p> <p><math>\leftrightarrow</math> E2 (MF)</p> <p><math>\leftrightarrow</math> E2 (ML)</p>                                                                                                                                                                                                                                                           |

|                                           |                                                                                                                                                                             |            |                                                                                                                                                                                                                                                                                                                                                                                                                                                     |                         |                                               |                                                                                                                                                         |
|-------------------------------------------|-----------------------------------------------------------------------------------------------------------------------------------------------------------------------------|------------|-----------------------------------------------------------------------------------------------------------------------------------------------------------------------------------------------------------------------------------------------------------------------------------------------------------------------------------------------------------------------------------------------------------------------------------------------------|-------------------------|-----------------------------------------------|---------------------------------------------------------------------------------------------------------------------------------------------------------|
| Morton <i>et al.</i> (2018) <sup>39</sup> | 56 younger males (23 ± 2 years old).<br><br>Data presented is a subgroup analysis (n=20) from the highest (n=10) and lowest (n=10) responders to the exercise intervention. | Chronic RE | Participants were randomised into either LR or HR. <b>HR:</b> 3 sets of 20-25 repetitions at 30-50%1RM to volitional failure. <b>LR:</b> 3 sets of 8-12 repetitions at 75-90%1RM to volitional failure. Both conditions trained 4d-week <sup>-1</sup> for 12 weeks, and the program included: leg press, seated row, bench press, hamstring curl, planks, shoulder press, bicep curls, tricep extensions, wide-grip pull downs, and knee extension. | DHT, Testosterone       | <b>Protein:</b> 5α-reductase                  | <b>High responders</b><br>↔ Free testosterone<br>↔ DHT<br>↑ 5α-reductase<br><br><b>Low responders</b><br>↔ Free testosterone<br>↔ DHT<br>↔ 5α-reductase |
| Sato <i>et al.</i> (2014) <sup>54</sup>   | 13 older males (67.2 ± 1.8 years old)                                                                                                                                       | Chronic RE | 3 sets of 10 repetitions of leg extension and leg flexion at 70% of 1RM, 3d-week <sup>-1</sup> for 12 weeks.<br><br>VL biopsies were obtained pre and 4-5 days post the final session. IM sex hormones were measured via ELISA.                                                                                                                                                                                                                     | DHEA, DHT, Testosterone | <b>Protein:</b> 3β-HSD, 17β-HSD, 5α-reductase | ↑ DHEA<br>↑ DHT<br>↑ Testosterone<br>↑ 3β-HSD<br>↑ 17β-HSD<br>↑ 5α-reductase                                                                            |

|                                           |                                                             |            |                                                                                                                                                                                                                                                                                                          |                                                                                                                               |                         |                                     |                                                                                                                                                                                                                                            |
|-------------------------------------------|-------------------------------------------------------------|------------|----------------------------------------------------------------------------------------------------------------------------------------------------------------------------------------------------------------------------------------------------------------------------------------------------------|-------------------------------------------------------------------------------------------------------------------------------|-------------------------|-------------------------------------|--------------------------------------------------------------------------------------------------------------------------------------------------------------------------------------------------------------------------------------------|
| Shi <i>et al.</i> (2019) <sup>62</sup>    | 14 ovariectomised female Sprague Dawley rats (12 weeks old) | Chronic AE | <p><b>Intervention:</b> 5 weeks of motorised treadmill running 6d week<sup>-1</sup>. During the first week, speed and duration were progressively increased to 60min, 20m/min, which was maintain for the intervention period.</p> <p><b>Control:</b> Same procedures but treadmill was not started.</p> | Soleus and plantaris muscles were used for analysis. Unclear when they were excised. IM sex hormones were measured via ELISA. | E2                      | <b>Protein:</b> P450arom            | <p><b>Soleus</b></p> <p>↑ E2 (ELISA), ↑ E2 (immunofluorescence)</p> <p>↑ P450arom (WB &amp; immunofluorescence)</p> <p><b>Plantaris</b></p> <p>↔ E2 (ELISA), ↑ E2 (immunofluorescence)</p> <p>↑ P450arom (WB &amp; immunofluorescence)</p> |
| Son <i>et al.</i> (2019) <sup>69</sup>    | C2C12 cells                                                 | Acute EPS  | The cells were electrically stimulated for 24h (1Hz, 2ms, 40V/60mm)                                                                                                                                                                                                                                      | IM sex hormones were measured via ELISA.                                                                                      | DHT, free testosterone  | <b>Protein:</b> 5α-reductase type I | <p>↔ DHT (EPS trending higher, p=0.0556)</p> <p>↑ Free testosterone</p> <p>↑ 5α-reductase type I</p>                                                                                                                                       |
| Vechin <i>et al.</i> (2023) <sup>67</sup> | 6 young males (26 ± 5 years old)                            | Acute RE   | <p><b>Low hormone (LH) condition:</b> Single arm lateral raised 10 sets of 8-12 RM.</p> <p><b>High hormone (HH) condition:</b> Same as LH but with additional back squat in a Smith machine 10 sets of 8-12RM.</p>                                                                                       | Deltoid biopsies were taken pre and 45 minutes post the sessions. IM sex hormones were measured via EIA.                      | DHEA, DHT, Testosterone | -                                   | <p><b>LH</b></p> <p>↔ DHEA</p> <p>↔ DHT</p> <p>↔ Testosterone</p> <p><b>HH</b></p> <p>↔ DHEA</p> <p>↔ DHT</p> <p>↔ Testosterone</p>                                                                                                        |

798

|                                                                                                                                                                                                                                                                                                                                                                                                                                                                                                                                                                                                |                                                                             |          |                                                                   |                                                                                                            |              |                          |                |
|------------------------------------------------------------------------------------------------------------------------------------------------------------------------------------------------------------------------------------------------------------------------------------------------------------------------------------------------------------------------------------------------------------------------------------------------------------------------------------------------------------------------------------------------------------------------------------------------|-----------------------------------------------------------------------------|----------|-------------------------------------------------------------------|------------------------------------------------------------------------------------------------------------|--------------|--------------------------|----------------|
| Vingren <i>et al.</i> (2008) <sup>68</sup>                                                                                                                                                                                                                                                                                                                                                                                                                                                                                                                                                     | 8 young males (21 ± 1 years old), 7 eumenorrheic females (24 ± 5 years old) | Acute RE | RE consisted of 6 sets of 10 repetitions at 80% of 1RM in squats. | VL biopsies were obtained pre, 10m post, and 70m after the session. IM sex hormones were measured via EIA. | Testosterone | Protein: 3β-HSD, 17β-HSD | <b>Males</b>   |
|                                                                                                                                                                                                                                                                                                                                                                                                                                                                                                                                                                                                |                                                                             |          |                                                                   |                                                                                                            |              |                          | ↔ Testosterone |
|                                                                                                                                                                                                                                                                                                                                                                                                                                                                                                                                                                                                |                                                                             |          |                                                                   |                                                                                                            |              |                          | ↔ 3β-HSD       |
|                                                                                                                                                                                                                                                                                                                                                                                                                                                                                                                                                                                                |                                                                             |          |                                                                   |                                                                                                            |              |                          | ↔ 17β-HSD      |
|                                                                                                                                                                                                                                                                                                                                                                                                                                                                                                                                                                                                |                                                                             |          |                                                                   |                                                                                                            |              |                          | <b>Females</b> |
|                                                                                                                                                                                                                                                                                                                                                                                                                                                                                                                                                                                                |                                                                             |          |                                                                   |                                                                                                            |              |                          | ↔ Testosterone |
|                                                                                                                                                                                                                                                                                                                                                                                                                                                                                                                                                                                                |                                                                             |          |                                                                   |                                                                                                            |              |                          | ↔ 3β-HSD       |
|                                                                                                                                                                                                                                                                                                                                                                                                                                                                                                                                                                                                |                                                                             |          |                                                                   |                                                                                                            |              |                          | ↔ 17β-HSD      |
| <hr/>                                                                                                                                                                                                                                                                                                                                                                                                                                                                                                                                                                                          |                                                                             |          |                                                                   |                                                                                                            |              |                          |                |
| 3β-HSD, 3-beta-hydroxysteroid dehydrogenase; 17β-HSD, 17-beta-hydroxysteroid dehydrogenase; AE, aerobic exercise; DHEA, dehydroepiandrosterone; DHT, dihydrotestosterone; E2, oestradiol; ELISA, enzyme linked immunosorbent assay; EIA, Enzyme immunoassay; HH, high hormone; HL, high load; HR, high repetition; IM, intramuscular; LH, low hormone; LL, low load; LR, low repetition; MF, mid follicular; ML, mid luteal; P450arom, aromatase cytochrome P-450; RE, resistance exercise; VL, vastus lateralis. ↑ significant increase, ↓ significant decrease, ↔ no significant difference. |                                                                             |          |                                                                   |                                                                                                            |              |                          |                |

799
