1 **Title:** The Role and Regulation of Intramuscular Sex Hormones in Skeletal Muscle: A  
2 Systematic Review

3

4 **Authors:** Viktor Engman<sup>1</sup>, Annabel J. Critchlow<sup>1</sup>, Eija K. Laakkonen<sup>2</sup>, Mette  
5 Hansen<sup>3</sup>, Shaun Mason<sup>1</sup>, Séverine Lamon<sup>1</sup>.

6 <sup>1</sup>Institute for Physical Activity and Nutrition, School of Exercise and Nutrition  
7 Sciences, Deakin University, Geelong, Australia

8 <sup>2</sup>Faculty of Sport and Health Sciences, University of Jyväskylä, Jyväskylä, Finland

9 <sup>3</sup>Department of Public Health, Aarhus University, Aarhus, Denmark

10

11 **Corresponding author:**

12 Associate Professor Séverine Lamon

13 ORCID ID: 0000-0002-3271-6551

14 Institute for Physical Activity and Nutrition

15 Deakin University, 221 Burwood Hwy, Victoria 3125, Australia

16 Ph: (+61 3) 9244 5571

17 Email: [severine.lamon@deakin.edu.au](mailto:severine.lamon@deakin.edu.au)

18 Supported by an Australian Research Council Future Fellowship (FT210100278).

19 **Disclosure statement:** The authors have nothing to disclose.

20 **Keywords:** Testosterone, Oestrogen, Sex hormones, Skeletal muscle.

## 21 **1 Abstract**

22 **Introduction:** Serum concentrations of androgens and oestrogens, the main male  
23 and female sex hormones, respectively, naturally fluctuate across the lifespan. Sex  
24 hormones are mainly produced in the gonads, but evidence suggests that they can  
25 also be locally synthesised in skeletal muscle. However, little is known about the  
26 purpose of intramuscular sex hormones biosynthesis and their role in skeletal  
27 muscle. This systematic review aimed to investigate 1) how intramuscular sex  
28 hormone levels vary across the lifespan, 2) whether intramuscular sex hormones are  
29 associated with skeletal muscle mass and function, and 3) whether exercise affects  
30 intramuscular sex hormone levels. **Methods:** Four databases were searched, and  
31 studies were included if they contained measurements of intramuscular sex  
32 hormones from healthy males and females free from any hormonal treatment, from  
33 rodents, or from cultured muscle cells. **Results:** Fifteen studies were included.  
34 Intramuscular testosterone was reduced in elderly males compared to their younger  
35 counterparts, but comparison of intramuscular sex hormone levels between pre- and  
36 postmenopausal females yielded inconclusive findings. Intramuscular androgens  
37 were positively associated with muscle mass and strength in males. In females,  
38 conflicting findings were reported for both oestradiol and androgens, and measures  
39 of muscle mass and function. Chronic exercise decreased androgens and oestradiol  
40 in females, but increased androgens in males. Acute exercise did not change  
41 intramuscular hormone levels in humans but increased them in rodents and cells.  
42 **Conclusion:** Current evidence suggests that ageing and exercise differentially  
43 modulate intramuscular sex hormone levels, and their association with muscle mass  
44 and function, between males and females.

## 45 **2 Introduction**

46 Maintenance of muscle mass and function is an integral part of healthy ageing.  
47 Across adulthood, muscle is lost at a median decennial rate of 4.7% in males and  
48 3.7% in females,<sup>1</sup> which is associated with increased mortality,<sup>2</sup> loss of  
49 independence and reduced quality of life.<sup>3,4</sup> In comparison to younger adults, older  
50 individuals exhibit a diminished anabolic response to hypertrophic stimuli, such as  
51 resistance exercise and protein intake,<sup>5,6</sup> which impairs their capacity to counteract  
52 age-related muscle loss.

53 Skeletal muscle is a particularly sex-biased organ with nearly 3000 genes  
54 differentially expressed between males and females in a postabsorptive state.<sup>7</sup>  
55 Consequently, males and females present distinct muscle phenotypes, which differ in  
56 terms of fibre type proportions, substrate metabolism, contractile speed and  
57 fatigability.<sup>8-10</sup> The rate of age-related muscle mass and functional decline is also  
58 sex-dependent,<sup>11,12</sup> with atrophy and functional impairments being more pronounced  
59 and severe in postmenopausal females.<sup>13</sup> Even though the ageing skeletal muscle  
60 transcriptomic signature is largely similar between sexes, the extent of the  
61 differentially expressed genes between young and older adults is sex-dependent.<sup>14,15</sup>

62 Physiological sex differences emerge as early as the first trimester of gestation but  
63 are accentuated during puberty, concomitant to the elevated secretion of sex steroid  
64 hormones,<sup>16-20</sup> predominantly androgens and oestrogens. After puberty, the serum  
65 levels of the androgen hormone testosterone is ~15 times higher in males than  
66 females.<sup>21</sup> Endogenous serum testosterone levels are positively associated with  
67 muscle mass and strength in males,<sup>22,23</sup> but not in females.<sup>24</sup> However,  
68 supraphysiological testosterone levels achieved through exogenous administration

69 have significant anabolic effects in both sexes, resulting in substantial and rapid  
70 increases in muscle mass and strength.<sup>25-28</sup>

71 The most potent of oestrogens, oestradiol (E2), fluctuates in the blood during the  
72 menstrual cycle in premenopausal females and is markedly enhanced during  
73 pregnancy.<sup>29</sup> Otherwise, E2 remains relatively stable during the reproductive years of  
74 adulthood.<sup>30,31</sup> During menopause, females experience a rapid and permanent  
75 decline in E2 levels whereas male levels are unaltered with ageing.<sup>31</sup> The  
76 relationship between serum oestrogen and indices of muscle mass and function  
77 remains equivocal, with conflicting findings regarding both muscle mass and strength  
78 in females,<sup>32</sup> and no apparent association in males.<sup>33,34</sup>

79 Serum sex hormone levels may be modified through exercise. Initiation of resistance  
80 training may increase basal testosterone levels in males but not females,<sup>35,36</sup> which  
81 may progressively increase for years with intense exercise training.<sup>36,37</sup> Even though  
82 basal testosterone levels are associated with muscle hypertrophy and strength  
83 gains,<sup>25,28</sup> muscle hypertrophy can occur when endogenous testosterone levels are  
84 suppressed, albeit to a lesser magnitude.<sup>38</sup> Others have suggested that the exercise  
85 induced elevations in androgen receptor (AR) content might be a determining factor  
86 for hypertrophic potential.<sup>39,40</sup> More recently, nuclear AR content was found to  
87 correlate with muscle hypertrophy in males, but not females, highlighting a potential  
88 sex-based discrepancy in the mechanisms of muscle hypertrophy.<sup>41,42</sup>

89 Serum E2 levels acutely increase during endurance exercise in both young females  
90 and males.<sup>43</sup> In females, the increments appear to be mediated by the menstrual  
91 status. Nakamura *et al.*<sup>44</sup> found that in eumenorrheic females, acute increments in  
92 circulating E2 levels were only detectable in the mid-luteal phase and absent in the

93 early follicular phase, while E2 remains unchanged following acute exercise in  
94 postmenopausal females.<sup>45</sup> Further, E2 was also unchanged in amenorrhoeic  
95 females following acute exercise.<sup>44</sup> The acute exercise-induced increases in E2  
96 observed in eumenorrhoeic females and males may be transient, as longitudinal  
97 training studies have failed to replicate such results over time.<sup>46,47</sup>

98 Classically, skeletal muscle was thought of as merely a target tissue for sex hormone  
99 signalling, as it expresses both the AR and oestrogen receptors (ERs).<sup>39,48,49</sup>  
100 However, extragonadal biosynthesis of steroid hormones occurs in a plethora of  
101 tissues,<sup>50</sup> including skeletal muscle. Aizawa *et al.* (2007)<sup>51</sup> first showed that skeletal  
102 muscle from male rats expresses the necessary enzymes, namely 3-beta-  
103 hydroxysteroid dehydrogenase ( $3\beta$ -HSD) and 17-beta-hydroxysteroid  
104 dehydrogenase ( $17\beta$ -HSD), to synthesise testosterone from its precursor  
105 dehydroepiandrosterone (DHEA) and aromatase cytochrome P-450 (P450arom) to  
106 convert testosterone into E2. Using DHEA treated rat myotubes, they also  
107 demonstrated a dose response relationship between DHEA concentration and  
108 subsequent intramuscular levels of testosterone and E2. Further, 3-oxo-5 $\alpha$ -steroid 4-  
109 dehydrogenase (5 $\alpha$ -reductase), the enzyme enabling the conversion of testosterone  
110 to the more potent DHT, is also expressed in cultured rodent skeletal muscle.<sup>52</sup> The  
111 expression of these enzymes has subsequently been confirmed in human male and  
112 female skeletal muscle.<sup>53,54</sup>

113 The role, regulation, and function of intramuscular sex hormones on skeletal muscle  
114 health is yet to be systematically reviewed to further our understanding of how sex  
115 hormones might relate to muscle mass and function over the lifespan. The objectives  
116 of this review were threefold and aimed to address the following research questions:  
117 1) whether intramuscular sex hormones vary across the life span in humans; 2)

118 whether intramuscular sex hormones are associated with muscle mass and function  
119 or increments in these, and 3) whether exercise impacts intramuscular sex hormone  
120 levels.

## 121 **3 Methods**

### 122 **3.1 Search Strategy**

123 The systematic review was registered at PROSPERO (CRD42023479951). Four  
124 databases (MEDLINE Complete, EMBASE, SPORTDiscus, and PubMed) were  
125 searched according to the full search criteria outlined in supplementary table S1. The  
126 databases were searched until October 27<sup>th</sup>, 2023.

#### 127 **3.1.1 Inclusion and exclusion criteria**

128 In brief, study subjects included healthy adults, rodent models and *in vitro* cell  
129 models all free from hormonal treatments. Measures of intramuscular sex hormones  
130 and/or enzymes involved in the hormone biosynthesis were required for all included  
131 studies. Different eligibility criteria were applied to answer the different research  
132 questions as outlined in supplementary table S2.

#### 133 **3.1.2 Screening and selection**

134 Following the database search, the relevant papers were imported into Covidence  
135 systematic review software (Veritas Health Innovation, Melbourne, Australia).<sup>55</sup>  
136 Duplicates were automatically removed. Two authors independently assessed  
137 eligibility through title and abstract screening and subsequently full-text assessment  
138 and removed irrelevant studies according to the pre-specified eligibility criteria. The  
139 PRISMA search diagram has been outlined in figure 1.

### 140 **3.1.3 Data extraction and quality assessment**

141 Information about study design, study subjects, methodology, and results were  
142 independently extracted by two authors from all eligible studies using a predesigned  
143 data extraction form in Covidence. Any conflicts between the two authors were  
144 resolved by jointly extracting the data from the relevant study.

145 Quality assessment was conducted using the appropriate Joanna Briggs Institute  
146 (JBI) critical appraisal tool for human studies based on the study design (cross  
147 sectional, randomised controlled trial, quasi experimental trial).<sup>56,57</sup> Here, the  
148 percentage of “yes” answers were tallied and scored accordingly:  $\leq 49\%$  yes = high  
149 risk of bias,  $50\text{-}69\%$  yes = moderate risk of bias,  $\geq 70\%$  yes = low risk of bias. Animal  
150 studies were appraised using SYRCLE’s risk of bias tool for animal studies and *in*  
151 *vitro* studies using an adapted version of the JBI Randomised Controlled Trial critical  
152 appraisal tool.<sup>58</sup>

### 153 **3.1.4 Methods of synthesis**

154 During the data extraction process, the included studies were assigned, analysed,  
155 and discussed according to each of the relevant aims. Due to anticipated study  
156 heterogeneity, study outcomes were not combined quantitatively into a meta-analysis.  
157 The strength of associations between intramuscular hormones and measures of  
158 muscle mass and function was converted to Pearson’s correlation coefficient where  
159 applicable and referred to as small ( $r \geq 0.1$  and  $< 0.3$ ), moderate ( $r \geq 0.3$  and  $< 0.5$ ), or  
160 large ( $r \geq 0.5$ ).

## 161 **4 Results**

### 162 **4.1 Study characteristics**

163 Following the database search and screening, 23 studies were included for full-text  
164 analysis, and 15 studies were deemed eligible. Three studies investigated how  
165 intramuscular sex hormones varied across the lifespan (aim 1),<sup>53,54,59</sup> eight studies  
166 investigated the putative relationship between intramuscular hormones and muscle  
167 mass and function (aim 2),<sup>39,45,53,54,59-62</sup> and 13 studies investigated the relationship  
168 between exercise and intramuscular sex hormone concentrations (aim 3).<sup>39,45,54,60-69</sup>  
169 Eight studies were excluded due to unavailability of a full-texts (n=3), incomplete  
170 information (n=1), and incorrect population (n=4).

### 171 **4.2 Quality assessment**

172 Using the JBI risk of bias tools, the cross-sectional human studies presented a  
173 moderate risk of bias,<sup>53,59</sup> and the quasi-experimental human trials all presented a  
174 low risk of bias.<sup>54,65-68</sup> Out of the two randomised controlled trials, one presented a  
175 low risk of bias whereas the other presented a high risk of bias.<sup>39,45</sup> Animal trials  
176 were critically appraised using the SYRCLE tool, where all included studies had a  
177 similar risk of bias, notably missing information on researcher blinding.<sup>60,62-64</sup> The two  
178 *in vitro* cell culture studies were critically appraised using a JBI adapted critical  
179 appraisal tool with variations in methodological explication.<sup>61,69</sup> The full quality  
180 assessment has been outlined in supplementary tables S3-S7.

### 181 **4.3 Intramuscular sex hormone levels across the lifespan**

182 Three human studies provided cross sectional data and measured intramuscular sex  
183 hormones via enzyme-linked immunosorbent assay (ELISA) or enzyme  
184 immunoassays (EIA). Two of these studies examined differences in intramuscular



185 sex hormone levels between pre- and postmenopausal females,<sup>53,59</sup> and one  
186 between young and older males (Table 1).<sup>54</sup> The findings were inconsistent across  
187 studies. In females, Pöllänen *et al.* (2015)<sup>59</sup> found that intramuscular E2 and  
188 testosterone were similar between pre- and postmenopausal females whereas  
189 intramuscular DHT was higher in the postmenopausal females. The same group  
190 (2011)<sup>53</sup> had however reported the opposite in an earlier study, where levels of  
191 intramuscular E2 and testosterone were elevated in the postmenopausal females  
192 compared to premenopausal females, and intramuscular DHT remained similar  
193 between the groups. Intramuscular DHEA did not differ between pre- and  
194 postmenopausal females in both studies.<sup>53,59</sup> Compared to premenopausal females,  
195 postmenopausal females had increased intramuscular 3 $\beta$ -HSD mRNA levels  
196 whereas intramuscular 17 $\beta$ -HSD, and 5 $\alpha$ -reductase type 1 and 2 mRNA were  
197 unaltered by menopausal status.<sup>53</sup> In males, intramuscular free testosterone, DHT,  
198 DHEA, 3 $\beta$ -HSD, 17 $\beta$ -HSD, and 5 $\alpha$ -reductase were all decreased in the older when  
199 compared to the young group.<sup>54</sup>

#### 200 **4.4 Intramuscular sex hormones and muscle mass and function**

201 Eight studies investigated the putative association between intramuscular sex  
202 hormones and muscle mass and function (Table 2).

##### 203 **4.4.1 Muscle mass and composition**

204 Four human studies, two animal studies, and one cell culture study assessed the  
205 putative associations between intramuscular sex hormones and measures of muscle  
206 mass and composition (Table 2). Following 12 weeks of aerobic exercise in male  
207 rats, a moderate significant positive correlation was found between gastrocnemius  
208 mass and intramuscular DHT levels.<sup>60</sup> In ovariectomised female rats following 5

209 weeks of aerobic exercise, soleus mass presented a strong significant positive  
210 association with intramuscular E2 levels.<sup>62</sup>

211 In postmenopausal females, Dalgaard *et al.*<sup>45</sup> reported large significant negative  
212 associations between intramuscular DHEA and lean body mass (LBM), and  
213 intramuscular DHEA and muscle cross sectional area (CSA), but found no such  
214 associations for intramuscular testosterone or E2. The same study found no  
215 associations between change in intramuscular DHEA, testosterone, and E2, and  
216 change in LBM and muscle CSA following a resistance training intervention.<sup>45</sup>  
217 Pöllänen *et al.* (2011)<sup>53</sup> assessed computed tomography attenuation (to infer fat  
218 infiltration, where a lower attenuation suggests a greater fat infiltration) in the  
219 quadriceps femoris (QF) muscle. They reported significant low to moderate negative  
220 associations between intramuscular E2 and testosterone, and QF attenuation, with  
221 no significant findings for intramuscular DHEA and DHT.<sup>53</sup>

222 In younger males, Morton *et al.*<sup>39</sup> pooled data from the highest (n=10) and lowest  
223 (n=10) exercise responders and found no significant associations between baseline,  
224 post intervention, or change in intramuscular free testosterone, DHT, and 5 $\alpha$ -  
225 reductase protein levels, and exercise induced changes in type I and II muscle fibre  
226 CSA and LBM. In older males, Sato *et al.*<sup>54</sup> reported moderate to strong correlations  
227 between increments in intramuscular free testosterone and DHT, and gains in  
228 quadriceps CSA. Feng *et al.*<sup>61</sup> found a strong significant positive correlation between  
229 intracellular E2 concentration and cell proliferation index in C2C12 cells following 8  
230 hours of mechanical stretch.

#### 231 **4.4.2 Muscle strength and function**

232 Four human studies assessed the putative association between intramuscular sex  
233 hormones and measures of muscle strength and function (Table 2). Following a 12-  
234 week resistance training intervention in older males, the increase in intramuscular  
235 free testosterone, DHT, and DHEA all presented a significant moderate to strong  
236 positive correlation with exercise induced increments in isokinetic leg extensor  
237 torque.<sup>54</sup>

238 In postmenopausal females, Dalgaard *et al.*<sup>45</sup> found no significant associations  
239 between intramuscular DHEA, testosterone, and E2, and maximal voluntary  
240 contraction (MVC) during leg flexion (MVCflex) and leg extension (MVCex), and  
241 muscle strength normalised to muscle CSA at baseline. Following an exercise  
242 intervention, maintenance of the intramuscular DHEA levels was strongly associated  
243 with improvements in MVCex, but not changes in MVCflex. Similarly, maintenance of  
244 intramuscular testosterone was strongly associated with improvements in MVCex  
245 and normalised muscle strength, but not MVCflex. Also, maintenance of  
246 intramuscular E2 was associated with improvements in normalised muscle  
247 strength.<sup>45</sup>

248 In grouped samples of pre- and postmenopausal females, intramuscular E2,  
249 testosterone and DHEA, but not DHT, presented significant strong associations with  
250 knee extensor strength.<sup>59</sup> However, in another study from the same group using a  
251 similar sample and design, they reported no significant associations between  
252 intramuscular E2, testosterone, DHEA, or DHT, and knee extensor strength when  
253 normalised to quadriceps femoris CSA.<sup>53</sup>

254 Muscle power was indirectly tested by two studies. Pöllänen *et al.* (2015)<sup>59</sup> found  
255 significant strong correlations between intramuscular E2, testosterone, and DHEA,  
256 but not DHT, and vertical jump height in their mixed cohort of pre- and  
257 postmenopausal females. Dalgaard *et al.*<sup>45</sup> found no significant associations  
258 between any of the intramuscular DHEA, testosterone, and E2 and vertical jump  
259 height, neither at baseline nor when comparing changes in the intramuscular  
260 hormones to changes in vertical jump height, only including postmenopausal  
261 females.

## 262 **4.5 Exercise, intramuscular sex hormones and expression of the local** 263 **intramuscular sex hormone biosynthesis machinery**

### 264 **4.5.1 Acute exercise**

265 Thirteen studies investigated the effects of acute (n=9) and chronic (n=5) effects of  
266 exercise on intramuscular sex hormone levels in humans (n=7), rats (n=4) or cells  
267 (n=2) (Table 3). In human males and females, a single session of resistance training  
268 (n=5 studies) did not change the intramuscular levels of testosterone, E2, DHT,  
269 DHEA nor protein levels for the key enzymes 3 $\beta$ -HSD, 17 $\beta$ -HSD, P450arom and 5 $\alpha$ -  
270 reductase.<sup>45,65-68</sup>

271 In contrast, in rats, a single session of aerobic training (n=2 studies) increased the  
272 intramuscular levels of testosterone, DHT, and DHEA in both male and female  
273 rats.<sup>63,64</sup> Intramuscular E2 increased in male but not female rats. Intramuscular 5 $\alpha$ -  
274 reductase mRNA levels remained unchanged in males but increased in female rats,  
275 while its protein levels increased in both sexes. Both intramuscular P450arom mRNA  
276 and protein levels increased in males, but significantly decreased in female rats.  
277 Intramuscular 3 $\beta$ -HSD mRNA increased in males but remained unchanged in female

278 rats. Intramuscular 17 $\beta$ -HSD mRNA was unchanged in males but increased in  
279 female rats, while intramuscular 17 $\beta$ -HSD protein increased in both.<sup>63,64</sup>

280 Using a C2C12 myotube model of acute mechanical stretch, Feng *et al.*<sup>61</sup> found that  
281 intracellular E2 levels increased following the intervention, intracellular 3 $\beta$ -HSD  
282 mRNA decreased but intracellular 3 $\beta$ -HSD protein increased, intracellular 17 $\beta$ -HSD  
283 mRNA and protein increased, and intracellular P450arom mRNA increased but not  
284 intracellular P450arom protein. Also in C2C12 cells, Son *et al.*<sup>69</sup> applied electric  
285 pulse stimulation for 24h, which resulted in significant increases in intracellular free  
286 testosterone and 5 $\alpha$ -reductase protein levels, but not in DHT levels.

#### 287 **4.5.2 Chronic exercise**

288 In a chronic resistance exercise intervention (n=49), subgroup analysis of the ten  
289 highest responders (as determined by myofiber CSA and LBM accretion) revealed  
290 no effect on intramuscular levels of free testosterone and DHT, but an increase in the  
291 5 $\alpha$ -reductase protein levels.<sup>39</sup> In the ten lowest responders, intramuscular levels of  
292 free testosterone, DHT and 5 $\alpha$ -reductase protein levels were unaltered.<sup>39</sup> In older  
293 males, chronic resistance training increased the intramuscular levels of testosterone,  
294 DHT, and DHEA, as well as intramuscular 3 $\beta$ -HSD, 17 $\beta$ -HSD, and 5 $\alpha$ -reductase  
295 protein levels following chronic resistance training.<sup>54</sup> In postmenopausal females,  
296 chronic resistance training led to significant decreases in intramuscular DHEA,  
297 testosterone, and E2.<sup>45</sup>

298 In female rats, chronic aerobic training did not affect intramuscular E2 levels in the  
299 plantaris muscle but increased in the soleus when analysed using ELISA, whilst  
300 intramuscular E2 levels increased in both muscles when analysed using  
301 immunofluorescent staining.<sup>62</sup> Intramuscular P450arom was elevated in both

302 muscles from female rats following exercise.<sup>62</sup> In male rats, intramuscular total and  
303 free testosterone, and DHEA remained unaltered whilst DHT increased after the  
304 aerobic training period.<sup>60</sup> Further, intramuscular 3 $\beta$ -HSD mRNA, and 5 $\alpha$ -reductase  
305 mRNA and protein and intramuscular P450arom mRNA and protein all increased  
306 whilst 17 $\beta$ -HSD mRNA and protein remained unaltered.<sup>60</sup>

## 307 **5 Discussion**

308 In the last two decades, more research has emerged investigating the role and  
309 regulation of intramuscular sex hormones, particularly testosterone and E2. Here we  
310 aimed to investigate 1) whether intramuscular sex hormones levels vary across the  
311 life span in humans, 2) whether intramuscular sex hormones levels are associated  
312 with muscle mass and function, or increments in these, and 3) whether exercise  
313 impacts intramuscular sex hormone levels and biosynthesis machinery.

### 314 **5.1 Intramuscular sex hormone regulation**

315 It is currently unclear whether there is a relationship between the levels of serum and  
316 intramuscular sex hormones, as determination of the biosynthesis location of the sex  
317 hormones measured within the muscle remains challenging. However, based on cell,  
318 animal, and human research intramuscular sex hormone regulation appears to be  
319 decoupled from that of serum hormones and possibly affected by some other  
320 signalling factors in serum. Using cultured rat myotubes Aizawa *et al.* (2007)<sup>51</sup> found  
321 that when the cells were incubated with DHEA, a bloodborne testosterone precursor,  
322 they synthesised testosterone and E2 in a DHEA dose-dependent manner. This  
323 suggests that skeletal muscle has the ability to synthesise these sex hormones in the  
324 presence of their precursors. These findings have subsequently been replicated by  
325 Pöllänen *et al.* (2015)<sup>59</sup> in human primary muscle cells. Incubation of cells in pre- or  
326 postmenopausal sera resulted in distinct expression patterns of the ERs. However,

327 the ER gene expressions did not differ between cells exposed to the  
328 postmenopausal sera from females with elevated E2 due to hormone replacement  
329 therapy (HRT) and those without. This suggests that other factors in the sera that  
330 varies with menopausal status, other than E2 itself, may affect intracellular hormone  
331 signalling.<sup>59</sup> In line with this hypothesis, they also reported that the intracellular  
332 hormone receptors were unaffected by incubation with pure E2.<sup>59</sup> Adding further  
333 complexity, differentiation of myoblasts to myotubes led to increased gene  
334 expression of P450arom, ERs and AR, but did not affect E2 levels, indicating that  
335 merely increasing the steroid hormone biosynthetic machinery does not lead to  
336 increased synthesis of E2.<sup>59</sup> Hence, the interplay between systemic and  
337 intramuscular hormone levels, and the gene expression along their synthesis  
338 pathway and their target receptors remains elusive.

339 In animal models, ovariectomy, that is, the removal of the ovaries to mimic a  
340 postmenopausal state, reduces the circulating levels of sex hormones in rats.<sup>70</sup> Shi  
341 *et al.*<sup>62</sup> reported that 5 weeks of treadmill running in ovariectomised rats increased  
342 intramuscular E2 levels. As they did not report circulating E2 levels, it is not entirely  
343 clear where these increments originate from. As reported by Zhao *et al.*,<sup>70</sup> plasma E2  
344 increments occur in the months following ovariectomy, which could potentially  
345 increase the intramuscular E2 levels, questioning the validity of ovariectomy as a  
346 model of the postmenopausal state. Exercise also promoted the expression of  
347 P450arom protein concomitant to the E2 increase, which suggests that the  
348 intramuscular increase in E2 might occur from intramuscular origins.

349 In humans, Pöllänen *et al.* (2015)<sup>59</sup> found no difference in intramuscular E2 between  
350 postmenopausal female twins where one twin used oestrogen containing HRT, and  
351 the other one did not. Likewise, following a 12-week progressive resistance training

352 intervention in a group of postmenopausal females receiving either oestrogen  
353 treatment or placebo, Dalgaard *et al.*<sup>45</sup> reported that whilst the serum E2 increased in  
354 the oestrogen treatment group, the intramuscular E2 and testosterone remained the  
355 same between the treatment and placebo condition. Further, whilst the resistance  
356 exercise intervention did not affect the circulating E2 and testosterone levels, the  
357 intramuscular E2 and testosterone levels were decreased. Altogether this suggests  
358 that intramuscular hormone levels are decoupled from serum hormone levels.

## 359 **5.2 Intramuscular sex hormones and ageing**

360 It is well established that serum E2 concentrations abruptly drop at menopause,<sup>31</sup> a  
361 pattern not conclusively reflected in the muscle. Pöllänen *et al.* (2011)<sup>53</sup> reported  
362 elevated intramuscular E2 levels in postmenopausal females compared to  
363 premenopausal counterparts, a pattern however not replicated in another study by  
364 the same group,<sup>59</sup> where intramuscular E2 levels remained unchanged across  
365 menopause. Similar inconclusive results were reported for testosterone and DHT in  
366 the two studies.<sup>53,59</sup> Nevertheless, both studies highlighted an increased ratio of  
367 intramuscular-to-serum hormone levels in the postmenopausal females compared to  
368 their premenopausal counterparts.<sup>53,59</sup> In contrast, when comparing young and old  
369 males, Sato *et al.*<sup>54</sup> found that intramuscular testosterone, DHT, and DHEA levels  
370 mirrored the age-related reduction in the serum hormones.

371 The reasons for the divergent findings of Pöllänen *et al.* (2011)<sup>53</sup> and (2015)<sup>59</sup>, and  
372 Sato *et al.*<sup>54</sup> are unclear but there are several differences between the studies that  
373 may hinder a robust comparison. The age gap between the younger and older group  
374 was substantially greater in Sato *et al.*<sup>54</sup> than in both Pöllänen *et al.* (2011)<sup>53</sup> and  
375 (2015)<sup>59</sup>. The former cohort also presented significant differences in body  
376 composition between the younger and older groups, whilst the pre- and



377 postmenopausal females were anthropometrically matched in both Pöllänen *et al.*  
378 (2011) and (2015).<sup>53,54,59</sup> Both age and body composition are well established  
379 moderators of systemic sex hormone levels.<sup>18,71</sup> Although intramuscular sex  
380 hormone levels appear to be regulated somewhat independently from the systemic  
381 sex hormones, one cannot exclude the possibility that age- and body composition  
382 affect the intramuscular sex hormones too, perhaps in a sex-specific manner. Future  
383 studies should control for these putative confounding variables.

### 384 **5.3 Intramuscular sex hormones and their association with muscle mass and** 385 **function**

386 Associations between circulating physiological levels of testosterone and lean body  
387 mass have been found in males,<sup>22</sup> but not females,<sup>24</sup> with some equivocal findings in  
388 the relationship between E2 and muscle mass in females.<sup>24</sup> In postmenopausal  
389 females, the relationship between intramuscular sex hormones and muscle mass  
390 reflected the circulating hormones, as intramuscular testosterone and E2 were not  
391 associated with muscle mass.<sup>24,32,45</sup> However, similar to circulating androgens,  
392 intramuscular androgens were associated with muscle CSA, but only in older  
393 males.<sup>22,39,54</sup>

394 Following an exercise intervention, it was found that exercise induced increments in  
395 intramuscular androgens and E2 were correlated to muscle mass and muscle cross  
396 sectional area in older males, and male and female rats,<sup>54,60,62</sup> but not younger  
397 males or postmenopausal females.<sup>39,45</sup> In females, increased intramuscular sex  
398 hormone levels were associated with a greater proportion of fat infiltration.<sup>53</sup> Notably,  
399 the aforementioned human trials found that the higher intramuscular testosterone  
400 levels the lower the muscle mass and the greater the loss of muscle quality  
401 (increased fat infiltration), while circulating testosterone levels did not correlate with

402 either muscle mass or muscle quality.<sup>53,54</sup> Fat tissue has a steroidogenic capacity,  
403 which appears to increase with age.<sup>72</sup> Likewise, intramuscular fat infiltration also  
404 increases with age,<sup>73</sup> making it possible that the associations between greater fat  
405 infiltration and intramuscular sex hormones originate from increased hormonal  
406 biosynthesis from the fat tissue. However, in a pooled sample of postmenopausal  
407 females randomised to either transdermal oestrogen replacement therapy or placebo  
408 and undergoing a resistance training intervention, intramuscular E2 and testosterone  
409 levels significantly decreased despite unaltered intramuscular fat levels. Further, no  
410 association between intramuscular sex hormones and intramuscular fat content was  
411 found,<sup>45</sup> altogether refuting the notion that the fat infiltration is the main determinant  
412 of intramuscular sex hormone levels.

413 Absolute knee extensor strength showed significant positive associations with  
414 several androgens in males and females, and E2 in females.<sup>54,59</sup> In females, these  
415 associations disappeared when normalised to muscle CSA.<sup>53</sup> However, even though  
416 Dalgaard *et al.*<sup>45</sup> found that both intramuscular testosterone and E2 decreased  
417 following a 12-week resistance training intervention in postmenopausal females, they  
418 did find that the better the maintenance of these intramuscular hormones, the greater  
419 the improvement of muscle function. Whilst Pöllänen *et al.* (2015)<sup>59</sup> reported their  
420 strongest associations between intramuscular sex hormones and vertical jump  
421 height in females, suggesting that the intramuscular hormones may modulate muscle  
422 contractile properties. Dalgaard *et al.*<sup>45</sup> found a numerical but non-significant  
423 association between intramuscular testosterone and E2, where the maintenance of  
424 testosterone and E2 were positively correlated with increased vertical jump height,  
425 albeit with a smaller cohort increasing the risk for a type II error. Generally, animal  
426 research supports the plausible association between muscle contractile properties

427 and intramuscular hormones, where avian and rodent research both indicate that  
428 fast twitch muscle phenotypes tend to express higher levels of the intramuscular sex  
429 hormones and the associated biosynthetic enzymes than more slow twitch muscle  
430 phenotypes.<sup>74</sup> Currently, intramuscular sex hormones' putative effect on contractile  
431 properties remains speculative. Future research should consider human fibre type  
432 specific measures of intramuscular sex hormones.

#### 433 **5.4 Exercise to manipulate intramuscular sex hormone levels**

434 A single resistance exercise training session did not affect intramuscular sex  
435 hormone levels in human, with all five studies included reporting no effect on  
436 intramuscular hormone levels and the gene and/or protein expression of relevant  
437 enzymes along the synthesis pathway.<sup>45,65-68</sup> In adult males, the most pronounced  
438 post-exercise elevation in circulating total testosterone is seen immediately following  
439 exercise cessation with a decrease of 0.015 nmol/L for each minute that follows  
440 thereafter.<sup>75</sup> The included trials conducted post exercise biopsies from 10 minutes to  
441 24 hours after the final exercise session, with only one study measuring the  
442 intramuscular hormone levels within 30 minutes following exercise, which is when  
443 the transient increase in serum testosterone typically returns to baseline.<sup>75</sup>  
444 Contrasting the results of the human trials, single bouts of running exercise were a  
445 potent stimulus to increase intramuscular androgen levels in both male and female  
446 rats, and E2 in male but not female rats.<sup>63,64</sup> Compared to the acute human trials, the  
447 exercising rats' muscles was excised immediately following exercise cessation.  
448 Whether temporal discrepancies in post-exercise muscle collection timing between  
449 the human and animal studies may explain the divergent findings remain unknown.  
450 The interventions also differed between humans and rats, where the latter were all  
451 exposed to aerobic exercise, which tends to yield a different molecular signalling

452 pattern than resistance training.<sup>76</sup> Considering the timeframe of the transient post-  
453 exercise elevation in circulating testosterone and the immediate increments in  
454 intramuscular sex hormones in rats, future research should consider collecting  
455 human biopsies directly following intense exercise.

456 In contrast to acute exercise interventions, 12 weeks of progressive resistance  
457 training led to reductions in intramuscular testosterone, DHEA, and E2 following the  
458 intervention in postmenopausal females.<sup>45</sup> In elderly males, chronic resistance  
459 training increased intramuscular levels of testosterone, DHT, and DHEA following a  
460 similar intervention,<sup>54</sup> whilst androgens remained unchanged in younger males  
461 following a resistance training intervention.<sup>39</sup> Given that Sato *et al.*<sup>54</sup> found that  
462 ageing led to a reduction in intramuscular sex hormones, and that exercise  
463 increased the intramuscular hormone levels in older participants towards levels seen  
464 in the younger participants, one could speculate that the lack of effect of resistance  
465 exercise on intramuscular sex hormones reported in Morton *et al.*<sup>39</sup> may be as their  
466 younger participants already had normal hormone levels, with exercise serving only  
467 to restore geriatric losses.

468 Both chronic exercise studies in rodents used aerobic treadmill running as their  
469 interventions.<sup>60,62</sup> Consequently, aerobic exercise caused intramuscular elevations in  
470 E2 in the soleus muscle in ovariectomised rats, but not in the plantaris from the  
471 same rats nor the gastrocnemius from male rats. Further, whilst DHT increased,  
472 DHEA and testosterone remained unchanged in the trained male rats compared to  
473 their sedentary counterparts. Studies are yet to measure intramuscular androgens in  
474 female rodent models following chronic exercise interventions.

## 475 **5.5 Methodological considerations**

476 At present, the methodology used to measure intramuscular sex hormones may not  
477 be sufficiently sensitive for accurate measures, particularly at low hormonal  
478 concentrations. Most studies used ELISA/EIA, which can both under or overestimate  
479 hormone levels, particularly at low concentrations.<sup>77,78</sup> Compared to immunoassays,  
480 liquid chromatography mass spectrometry (LC/MS) yields a significantly lower  
481 variability and minimises measurement error in biological fluids.<sup>77</sup> Whether this  
482 measurement error at relatively low concentrations is reflected in the muscle remains  
483 untested. One can however surmise that it would be similar, as the same pattern is  
484 reflected in other matrices such as urine and saliva.<sup>79,80</sup>

485 To the best of the authors' knowledge, no method has yet been validated to measure  
486 intramuscular sex hormones. Hence, there is a need for standardised and validated  
487 methodology to ensure valid and reliable measures of the intramuscular sex  
488 hormones and facilitate the comparison of findings between studies. Such  
489 methodology will likely be based on mass spectrometry, the gold standard of  
490 hormonal measurements in other matrices.<sup>81</sup>

## 491 **5.6 Conclusions**

492 Whilst the research field of intramuscular sex hormones present mostly inconclusive  
493 and contradictory findings between studies, the possible relationships between  
494 skeletal muscle mass and function and intramuscular hormones warrant further  
495 investigation, with considerations into age and sex as potential confounding  
496 variables.

## 497 **6 Acknowledgements**

498 Séverine Lamon is supported by an Australian Research Council Future Fellowship

499 (FT210100278).

## 500 **7 References**

- 501 1. Mitchell WK, Williams J, Atherton P, Larvin M, Lund J, Narici M. Sarcopenia,  
502 dynapenia, and the impact of advancing age on human skeletal muscle size and  
503 strength; a quantitative review. *Front Physiol.* 2012;3:260.  
504 doi:10.3389/fphys.2012.00260
- 505 2. Xu J, Wan CS, Ktoris K, Reijnierse EM, Maier AB. Sarcopenia Is Associated  
506 with Mortality in Adults: A Systematic Review and Meta-Analysis. *Gerontology.*  
507 2021;68(4):361-376. doi:10.1159/000517099
- 508 3. Beudart C, Demonceau C, Reginster J-Y, et al. Sarcopenia and health-  
509 related quality of life: A systematic review and meta-analysis. *Journal of Cachexia,*  
510 *Sarcopenia and Muscle.* 2023/06/01 2023;14(3):1228-1243.  
511 doi:<https://doi.org/10.1002/jcsm.13243>
- 512 4. dos Santos L, Cyrino ES, Antunes M, Santos DA, Sardinha LB. Sarcopenia  
513 and physical independence in older adults: the independent and synergic role of  
514 muscle mass and muscle function. *Journal of Cachexia, Sarcopenia and Muscle.*  
515 2017/04/01 2017;8(2):245-250. doi:<https://doi.org/10.1002/jcsm.12160>
- 516 5. Kumar V, Selby A, Rankin D, et al. Age-related differences in the dose-  
517 response relationship of muscle protein synthesis to resistance exercise in young  
518 and old men. *The Journal of Physiology.* 2009;587(1):211-217.  
519 doi:<https://doi.org/10.1113/jphysiol.2008.164483>
- 520 6. Moore DR, Churchward-Venne TA, Witard O, et al. Protein ingestion to  
521 stimulate myofibrillar protein synthesis requires greater relative protein intakes in

- 522 healthy older versus younger men. *J Gerontol A Biol Sci Med Sci*. Jan  
523 2015;70(1):57-62. doi:10.1093/gerona/glu103
- 524 7. Oliva M, Muñoz-Aguirre M, Kim-Hellmuth S, et al. The impact of sex on gene  
525 expression across human tissues. *Science*. Sep 11  
526 2020;369(6509)doi:10.1126/science.aba3066
- 527 8. Nuzzo JL. Sex differences in skeletal muscle fiber types: A meta-analysis. *Clin*  
528 *Anat*. Jul 10 2023;doi:10.1002/ca.24091
- 529 9. Landen S, Hiam D, Voisin S, Jacques M, Lamon S, Eynon N. Physiological  
530 and molecular sex differences in human skeletal muscle in response to exercise  
531 training. *The Journal of Physiology*. 2023/02/01 2023;601(3):419-434.  
532 doi:<https://doi.org/10.1113/JP279499>
- 533 10. Wüst RCI, Morse CI, De Haan A, Jones DA, Degens H. Sex differences in  
534 contractile properties and fatigue resistance of human skeletal muscle. *Experimental*  
535 *Physiology*. 2008/07/01 2008;93(7):843-850.  
536 doi:<https://doi.org/10.1113/expphysiol.2007.041764>
- 537 11. Kirchengast S, Huber J. Gender and age differences in lean soft tissue mass  
538 and sarcopenia among healthy elderly. *Anthropol Anz*. Jun 2009;67(2):139-51.  
539 doi:10.1127/0003-5548/2009/0018
- 540 12. Suetta C, Haddock B, Alcazar J, et al. The Copenhagen Sarcopenia Study:  
541 lean mass, strength, power, and physical function in a Danish cohort aged 20–93  
542 years. *Journal of Cachexia, Sarcopenia and Muscle*. 2019;10(6):1316-1329.  
543 doi:<https://doi.org/10.1002/jcsm.12477>



- 544 13. Janssen I, Heymsfield SB, Ross R. Low Relative Skeletal Muscle Mass  
545 (Sarcopenia) in Older Persons Is Associated with Functional Impairment and  
546 Physical Disability. *Journal of the American Geriatrics Society*. 2002;50(5):889-896.  
547 doi:<https://doi.org/10.1046/j.1532-5415.2002.50216.x>
- 548 14. de Jong J, Attema BJ, van der Hoek MD, et al. Sex differences in skeletal  
549 muscle-aging trajectory: same processes, but with a different ranking. *Geroscience*.  
550 Feb 23 2023;doi:10.1007/s11357-023-00750-4
- 551 15. Gharpure M, Chen J, Nerella R, et al. Sex-specific alteration in human muscle  
552 transcriptome with age. *GeroScience*. 2023/06/01 2023;45(3):1303-1316.  
553 doi:10.1007/s11357-023-00795-5
- 554 16. Catley MJ, Tomkinson GR. Normative health-related fitness values for  
555 children: analysis of 85347 test results on 9–17-year-old Australians since 1985.  
556 *British Journal of Sports Medicine*. 2013;47(2):98-108. doi:10.1136/bjsports-2011-  
557 090218
- 558 17. Tomkinson GR, Carver KD, Atkinson F, et al. European normative values for  
559 physical fitness in children and adolescents aged 9-17 years: results from 2 779 165  
560 Eurofit performances representing 30 countries. *Br J Sports Med*. Nov  
561 2018;52(22):1445-14563. doi:10.1136/bjsports-2017-098253
- 562 18. Bae YJ, Zeidler R, Baber R, et al. Reference intervals of nine steroid  
563 hormones over the life-span analyzed by LC-MS/MS: Effect of age, gender, puberty,  
564 and oral contraceptives. *The Journal of Steroid Biochemistry and Molecular Biology*.  
565 2019/10/01/ 2019;193:105409. doi:<https://doi.org/10.1016/j.jsbmb.2019.105409>

- 566 19. Handelsman DJ. Sex differences in athletic performance emerge coinciding  
567 with the onset of male puberty. *Clinical Endocrinology*. 2017;87(1):68-72.  
568 doi:<https://doi.org/10.1111/cen.13350>
- 569 20. Alur P. Sex Differences in Nutrition, Growth, and Metabolism in Preterm  
570 Infants. Review. *Frontiers in Pediatrics*. 2019-February-07  
571 2019;7doi:10.3389/fped.2019.00022
- 572 21. Handelsman DJ, Hirschberg AL, Bermon S. Circulating Testosterone as the  
573 Hormonal Basis of Sex Differences in Athletic Performance. *Endocrine Reviews*.  
574 2018;39(5):803-829. doi:10.1210/er.2018-00020
- 575 22. Mouser JG, Loprinzi PD, Loenneke JP. The association between physiologic  
576 testosterone levels, lean mass, and fat mass in a nationally representative sample of  
577 men in the United States. *Steroids*. 2016/11/01/ 2016;115:62-66.  
578 doi:<https://doi.org/10.1016/j.steroids.2016.08.009>
- 579 23. Chiu H-T, Shih M-T, Chen W-L. Examining the association between grip  
580 strength and testosterone. *The Aging Male*. 2020/12/04 2020;23(5):915-922.  
581 doi:10.1080/13685538.2019.1632282
- 582 24. Alexander SE, Pollock AC, Lamon S. The effect of sex hormones on skeletal  
583 muscle adaptation in females. *Eur J Sport Sci*. Jul 2022;22(7):1035-1045.  
584 doi:10.1080/17461391.2021.1921854
- 585 25. Bhasin S, Woodhouse L, Casaburi R, et al. Testosterone dose-response  
586 relationships in healthy young men. *Am J Physiol Endocrinol Metab*. Dec  
587 2001;281(6):E1172-81. doi:10.1152/ajpendo.2001.281.6.E1172

- 588 26. Hirschberg AL, Elings Knutsson J, Helge T, et al. Effects of moderately  
589 increased testosterone concentration on physical performance in young women: a  
590 double blind, randomised, placebo controlled study. *Br J Sports Med*. May  
591 2020;54(10):599-604. doi:10.1136/bjsports-2018-100525
- 592 27. Horwath O, Apró W, Moberg M, et al. Fiber type-specific hypertrophy and  
593 increased capillarization in skeletal muscle following testosterone administration in  
594 young women. *J Appl Physiol (1985)*. May 1 2020;128(5):1240-1250.  
595 doi:10.1152/jappphysiol.00893.2019
- 596 28. Storer TW, Magliano L, Woodhouse L, et al. Testosterone Dose-Dependently  
597 Increases Maximal Voluntary Strength and Leg Power, but Does Not Affect  
598 Fatigability or Specific Tension. *The Journal of Clinical Endocrinology & Metabolism*.  
599 2003;88(4):1478-1485. doi:10.1210/jc.2002-021231
- 600 29. Schock H, Zeleniuch-Jacquotte A, Lundin E, et al. Hormone concentrations  
601 throughout uncomplicated pregnancies: a longitudinal study. *BMC Pregnancy and*  
602 *Childbirth*. 2016/07/04 2016;16(1):146. doi:10.1186/s12884-016-0937-5
- 603 30. Farage MA, Neill S, MacLean AB. Physiological Changes Associated with the  
604 Menstrual Cycle: A Review. *Obstetrical & Gynecological Survey*. 2009;64(1)
- 605 31. Frederiksen H, Johannsen TH, Andersen SE, et al. Sex-specific Estrogen  
606 Levels and Reference Intervals from Infancy to Late Adulthood Determined by LC-  
607 MS/MS. *J Clin Endocrinol Metab*. Mar 1 2020;105(3):754-68.  
608 doi:10.1210/clinem/dgz196
- 609 32. Critchlow AJ, Hiam D, Williams R, Scott D, Lamon S. The role of estrogen in  
610 female skeletal muscle aging: A systematic review. *Maturitas*. Sep 7  
611 2023;178:107844. doi:10.1016/j.maturitas.2023.107844

- 612 33. Araujo AB, Travison TG, Bhasin S, et al. Association between testosterone  
613 and estradiol and age-related decline in physical function in a diverse sample of  
614 men. *J Am Geriatr Soc*. Nov 2008;56(11):2000-8. doi:10.1111/j.1532-  
615 5415.2008.01965.x
- 616 34. van den Beld AW, de Jong FH, Grobbee DE, Pols HAP, Lamberts SWJ.  
617 Measures of Bioavailable Serum Testosterone and Estradiol and Their Relationships  
618 with Muscle Strength, Bone Density, and Body Composition in Elderly Men\*. *The*  
619 *Journal of Clinical Endocrinology & Metabolism*. 2000;85(9):3276-3282.  
620 doi:10.1210/jcem.85.9.6825
- 621 35. Staron RS, Karapondo DL, Kraemer WJ, et al. Skeletal muscle adaptations  
622 during early phase of heavy-resistance training in men and women. *Journal of*  
623 *Applied Physiology*. 1994/03/01 1994;76(3):1247-1255.  
624 doi:10.1152/jappl.1994.76.3.1247
- 625 36. Riachy R, McKinney K, Tuvdendorj DR. Various Factors May Modulate the  
626 Effect of Exercise on Testosterone Levels in Men. *J Funct Morphol Kinesiol*. Nov 7  
627 2020;5(4)doi:10.3390/jfmk5040081
- 628 37. Hakkinen K, Pakarinen A, Alen M, Kauhanen H, Komi PV. Neuromuscular and  
629 hormonal adaptations in athletes to strength training in two years. *Journal of Applied*  
630 *Physiology*. 1988/12/01 1988;65(6):2406-2412. doi:10.1152/jappl.1988.65.6.2406
- 631 38. Kvorning T, Andersen M, Brixen K, Madsen K. Suppression of endogenous  
632 testosterone production attenuates the response to strength training: a randomized,  
633 placebo-controlled, and blinded intervention study. *American Journal of Physiology-*  
634 *Endocrinology and Metabolism*. 2006/12/01 2006;291(6):E1325-E1332.  
635 doi:10.1152/ajpendo.00143.2006

- 636 39. Morton RW, Sato K, Gallaugher MPB, et al. Muscle Androgen Receptor  
637 Content but Not Systemic Hormones Is Associated With Resistance Training-  
638 Induced Skeletal Muscle Hypertrophy in Healthy, Young Men. Original Research.  
639 *Frontiers in Physiology*. 2018-October-09 2018;9doi:10.3389/fphys.2018.01373
- 640 40. Mitchell CJ, Churchward-Venne TA, Bellamy L, Parise G, Baker SK, Phillips  
641 SM. Muscular and Systemic Correlates of Resistance Training-Induced Muscle  
642 Hypertrophy. *PLOS ONE*. 2013;8(10):e78636. doi:10.1371/journal.pone.0078636
- 643 41. Hatt AA, Kamal M, Mikhail AI, et al. Nuclear-localized androgen receptor  
644 content following resistance exercise training is associated with hypertrophy in males  
645 but not females. *The FASEB Journal*. 2024/01/31 2024;38(2):e23403.  
646 doi:<https://doi.org/10.1096/fj.202301291RR>
- 647 42. Alexander SE, Gatto B, Knowles OE, et al. Bioavailable testosterone and  
648 androgen receptor activation, but not total testosterone, are associated with muscle  
649 mass and strength in females. *J Physiol*. Oct 11 2024;doi:10.1113/jp286803
- 650 43. Bunt JC, Bemben DA, Bahr JM. Comparison of estradiol and testosterone  
651 levels during and immediately following prolonged exercise in moderately active and  
652 trained males and females. *Endocrine Research*. 1987;13(2):157-172.  
653 doi:10.3109/07435808709023670
- 654 44. Nakamura Y, Aizawa K, Imai T, Kono I, Mesaki N. Hormonal Responses to  
655 Resistance Exercise during Different Menstrual Cycle States. *Medicine & Science in*  
656 *Sports & Exercise*. 2011;43(6)
- 657 45. Dalgaard LB, Oxfeldt M, Dam TV, Hansen M. Intramuscular sex steroid  
658 hormones are reduced after resistance training in postmenopausal women, but not

659 affected by estrogen therapy. *Steroids*. 2022/10/01/ 2022;186:109087.

660 doi:<https://doi.org/10.1016/j.steroids.2022.109087>

661 46. Smith AJ, Phipps WR, Arikawa AY, et al. Effects of Aerobic Exercise on  
662 Premenopausal Sex Hormone Levels: Results of the WISER Study, a Randomized  
663 Clinical Trial in Healthy, Sedentary, Eumenorrheic Women. *Cancer Epidemiology,*  
664 *Biomarkers & Prevention*. 2011;20(6):1098-1106. doi:10.1158/1055-9965.EPI-10-  
665 1219

666 47. HAWKINS VN, FOSTER-SCHUBERT K, CHUBAK J, et al. Effect of Exercise  
667 on Serum Sex Hormones in Men: A 12-Month Randomized Clinical Trial. *Medicine &*  
668 *Science in Sports & Exercise*. 2008;40(2):223-233.  
669 doi:10.1249/mss.0b013e31815bbbba9

670 48. Ekenros L, Papoutsi Z, Fridén C, Dahlman Wright K, Lindén Hirschberg A.  
671 Expression of sex steroid hormone receptors in human skeletal muscle during the  
672 menstrual cycle. *Acta Physiol (Oxf)*. Feb 2017;219(2):486-493.  
673 doi:10.1111/apha.12757

674 49. Wiik A, Ekman M, Johansson O, Jansson E, Esbjörnsson M. Expression of  
675 both oestrogen receptor alpha and beta in human skeletal muscle tissue.  
676 *Histochemistry and Cell Biology*. 2009/02/01 2009;131(2):181-189.  
677 doi:10.1007/s00418-008-0512-x

678 50. Barakat R, Oakley O, Kim H, Jin J, Ko CJ. Extra-gonadal sites of estrogen  
679 biosynthesis and function. *BMB Rep*. Sep 2016;49(9):488-96.  
680 doi:10.5483/bmbrep.2016.49.9.141

681 51. Aizawa K, Iemitsu M, Maeda S, et al. Expression of steroidogenic enzymes  
682 and synthesis of sex steroid hormones from DHEA in skeletal muscle of rats.

- 683 *American Journal of Physiology-Endocrinology and Metabolism*. 2007/02/01  
684 2007;292(2):E577-E584. doi:10.1152/ajpendo.00367.2006
- 685 52. Sato K, Iemitsu M, Aizawa K, Ajisaka R. Testosterone and DHEA activate the  
686 glucose metabolism-related signaling pathway in skeletal muscle. *American Journal*  
687 *of Physiology-Endocrinology and Metabolism*. 2008/05/01 2008;294(5):E961-E968.  
688 doi:10.1152/ajpendo.00678.2007
- 689 53. Pöllänen E, Sipilä S, Alen M, et al. Differential influence of peripheral and  
690 systemic sex steroids on skeletal muscle quality in pre- and postmenopausal  
691 women. *Aging Cell*. Aug 2011;10(4):650-60. doi:10.1111/j.1474-9726.2011.00701.x
- 692 54. Sato K, Iemitsu M, Matsutani K, Kurihara T, Hamaoka T, Fujita S. Resistance  
693 training restores muscle sex steroid hormone steroidogenesis in older men. *Faseb j*.  
694 Apr 2014;28(4):1891-7. doi:10.1096/fj.13-245480
- 695 55. Covidence systematic review software. Veritas Health Innovation.  
696 [www.covidence.org](http://www.covidence.org)
- 697 56. Tufanaru C, Munn Z, Aromataris E, Campbell J, Hopp L. Chapter 3:  
698 Systematic reviews of effectiveness. *JBIC Manual for Evidence Synthesis*. 2020:chap  
699 3. <https://synthesismanual.jbi.global>
- 700 57. Moola S, Munn Z, Tufanaru C, et al. Chapter 7: Systematic reviews of etiology  
701 and risk. *JBIC Manual for Evidence Synthesis*. 2020:chap 7.  
702 <https://synthesismanual.jbi.global>
- 703 58. Hooijmans CR, Rovers MM, de Vries RB, Leenaars M, Ritskes-Hoitinga M,  
704 Langendam MW. SYRCLE's risk of bias tool for animal studies. *BMC Med Res*  
705 *Methodol*. Mar 26 2014;14:43. doi:10.1186/1471-2288-14-43

- 706 59. Pöllänen E, Kangas R, Horttanainen M, et al. Intramuscular sex steroid  
707 hormones are associated with skeletal muscle strength and power in women with  
708 different hormonal status. *Aging Cell*. Apr 2015;14(2):236-48. doi:10.1111/accel.12309
- 709 60. Aizawa K, Iemitsu M, Maeda S, Mesaki N, Ushida T, Akimoto T. Endurance  
710 exercise training enhances local sex steroidogenesis in skeletal muscle. *Med Sci*  
711 *Sports Exerc*. Nov 2011;43(11):2072-80. doi:10.1249/MSS.0b013e31821e9d74
- 712 61. Feng Y, Wu J, Cheng Z, Zhang J, Lu J, Shi R. Mechanical stretch enhances  
713 sex steroidogenesis in C(2)C(12) skeletal muscle cells. *Steroids*. Oct  
714 2019;150:108434. doi:10.1016/j.steroids.2019.108434
- 715 62. Shi R, Tian X, Feng Y, et al. Expression of aromatase and synthesis of sex  
716 steroid hormones in skeletal muscle following exercise training in ovariectomized  
717 rats. *Steroids*. Mar 2019;143:91-96. doi:10.1016/j.steroids.2019.01.003
- 718 63. Aizawa K, Iemitsu M, Maeda S, et al. Acute exercise activates local bioactive  
719 androgen metabolism in skeletal muscle. *Steroids*. Mar 2010;75(3):219-23.  
720 doi:10.1016/j.steroids.2009.12.002
- 721 64. Aizawa K, Iemitsu M, Otsuki T, Maeda S, Miyauchi T, Mesaki N. Sex  
722 differences in steroidogenesis in skeletal muscle following a single bout of exercise  
723 in rats. *J Appl Physiol (1985)*. Jan 2008;104(1):67-74.  
724 doi:10.1152/jappphysiol.00558.2007
- 725 65. Cardaci TD, Machek SB, Wilburn DT, Heilesen JL, Willoughby DS. High-Load  
726 Resistance Exercise Augments Androgen Receptor–DNA Binding and Wnt/ $\beta$ -Catenin  
727 Signaling without Increases in Serum/Muscle Androgens or Androgen Receptor  
728 Content. *Nutrients*. 2020;12(12):3829.



- 729 66. Haines M, McKinley-Barnard SK, Andre TL, Gann JJ, Hwang PS, Willoughby  
730 DS. Skeletal Muscle Estrogen Receptor Activation in Response to Eccentric Exercise  
731 Up-Regulates Myogenic-Related Gene Expression Independent of Differing Serum  
732 Estradiol Levels Occurring during the Human Menstrual Cycle. *J Sports Sci Med*.  
733 Mar 2018;17(1):31-39.
- 734 67. Vechin FC, Vingren JL, Telles GD, et al. Acute changes in serum and skeletal  
735 muscle steroids in resistance-trained men. *Front Endocrinol (Lausanne)*.  
736 2023;14:1081056. doi:10.3389/fendo.2023.1081056
- 737 68. Vingren JL, Kraemer WJ, Hatfield DL, et al. Effect of resistance exercise on  
738 muscle steroidogenesis. *J Appl Physiol (1985)*. Dec 2008;105(6):1754-60.  
739 doi:10.1152/jappphysiol.91235.2008
- 740 69. Son B-K, Eto M, Oura M, et al. Low-Intensity Exercise Suppresses  
741 CCAAT/Enhancer-Binding Protein  $\delta$ /Myostatin Pathway Through Androgen Receptor  
742 in Muscle Cells. *Gerontology*. 2019;65(4):397-406. doi:10.1159/000499826
- 743 70. Zhao H, Tian Z, Hao J, Chen B. Extragonadal aromatization increases with  
744 time after ovariectomy in rats. *Reprod Biol Endocrinol*. Jan 21 2005;3:6.  
745 doi:10.1186/1477-7827-3-6
- 746 71. Bekaert M, Van Nieuwenhove Y, Calders P, et al. Determinants of  
747 testosterone levels in human male obesity. *Endocrine*. 2015/09/01 2015;50(1):202-  
748 211. doi:10.1007/s12020-015-0563-4
- 749 72. Misso ML, Jang C, Adams J, et al. Adipose aromatase gene expression is  
750 greater in older women and is unaffected by postmenopausal estrogen therapy.  
751 *Menopause*. 2005;12(2)

- 752 73. Abildgaard J, Danielsen ER, Dorph E, et al. Ectopic Lipid Deposition Is  
753 Associated With Insulin Resistance in Postmenopausal Women. *The Journal of*  
754 *Clinical Endocrinology & Metabolism*. 2018;103(9):3394-3404. doi:10.1210/jc.2018-  
755 00554
- 756 74. Schuppe ER, Tobiansky D, Goller F, Fuxjager MJ. Specialized androgen  
757 synthesis in skeletal muscles that actuate elaborate social displays. *Journal of*  
758 *Experimental Biology*. 2022;225(12):jeb243730. doi:10.1242/jeb.243730
- 759 75. D'Andrea S, Spaggiari G, Barbonetti A, Santi D. Endogenous transient  
760 doping: physical exercise acutely increases testosterone levels—results from a  
761 meta-analysis. *Journal of Endocrinological Investigation*. 2020/10/01  
762 2020;43(10):1349-1371. doi:10.1007/s40618-020-01251-3
- 763 76. Dickinson JM, D'Lugos AC, Naymik MA, et al. Transcriptome response of  
764 human skeletal muscle to divergent exercise stimuli. *Journal of Applied Physiology*.  
765 2018/06/01 2018;124(6):1529-1540. doi:10.1152/jappphysiol.00014.2018
- 766 77. Ankarberg-Lindgren C, Becker C, Svala E, Ryberg H. Methodological  
767 considerations in determining sex steroids in children: comparison of conventional  
768 immunoassays with liquid chromatography-tandem mass spectrometry.  
769 2024;62(1):85-96. *Clinical Chemistry and Laboratory Medicine (CCLM)*.  
770 doi:doi:10.1515/cclm-2023-0344
- 771 78. Aydin S. A short history, principles, and types of ELISA, and our laboratory  
772 experience with peptide/protein analyses using ELISA. *Peptides*. 2015/10/01/  
773 2015;72:4-15. doi:<https://doi.org/10.1016/j.peptides.2015.04.012>
- 774 79. Faupel-Badger JM, Fuhrman BJ, Xu X, et al. Comparison of Liquid  
775 Chromatography-Tandem Mass Spectrometry, RIA, and ELISA Methods for

776 Measurement of Urinary Estrogens. *Cancer Epidemiology, Biomarkers & Prevention*.

777 2010;19(1):292-300. doi:10.1158/1055-9965.EPI-09-0643

778 80. Welker KM, Lassetter B, Brandes CM, Prasad S, Koop DR, Mehta PH. A

779 comparison of salivary testosterone measurement using immunoassays and tandem

780 mass spectrometry. *Psychoneuroendocrinology*. 2016/09/01/ 2016;71:180-188.

781 doi:<https://doi.org/10.1016/j.psyneuen.2016.05.022>

782 81. Conklin SE, Knezevic CE. Advancements in the gold standard: Measuring

783 steroid sex hormones by mass spectrometry. *Clinical Biochemistry*. 2020/08/01/

784 2020;82:21-32. doi:<https://doi.org/10.1016/j.clinbiochem.2020.03.008>

785

## 786 8 Figures and Tables

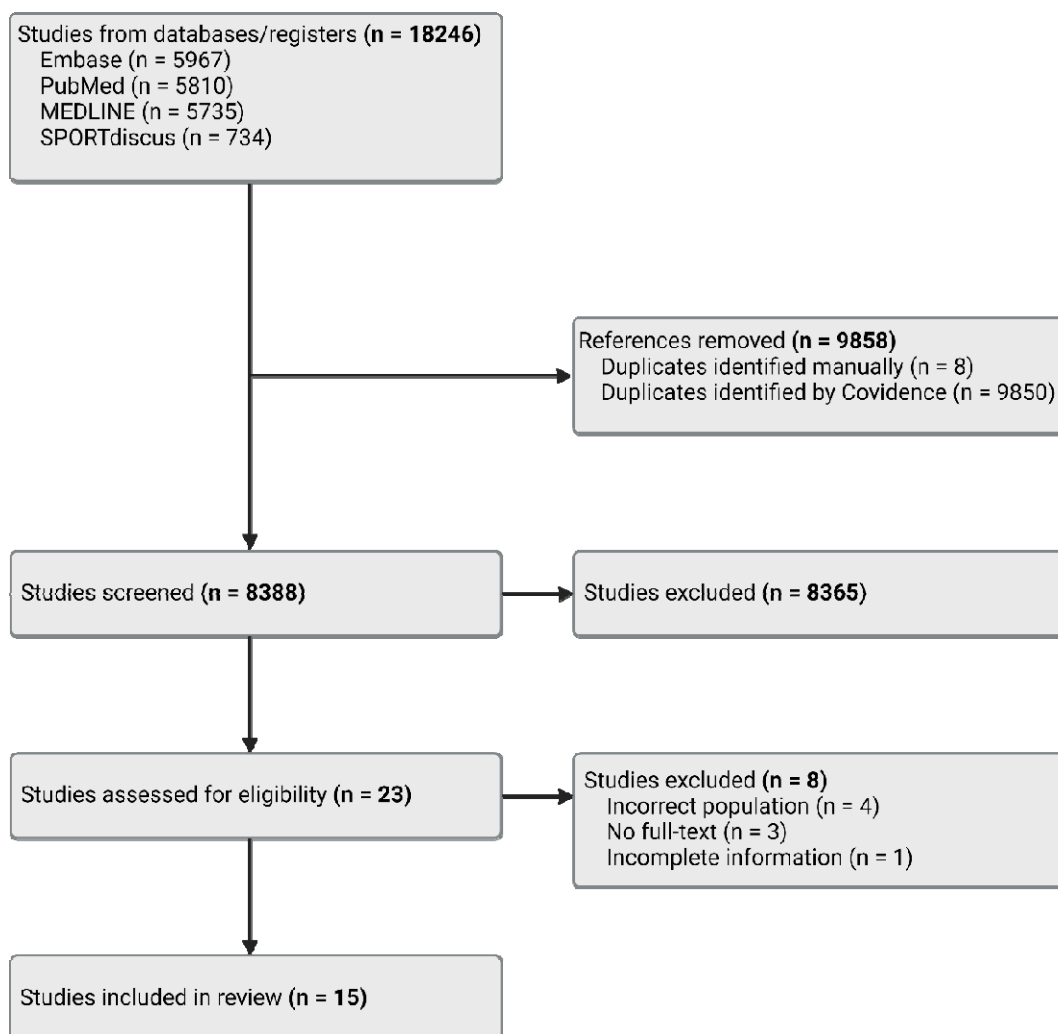

787

788 **Figure 1.** PRISMA diagram outlining the systematic review search and assessment.

**Table 1.** Studies investigating how intramuscular sex hormones vary across the lifespan

| Study                                       | Study type      | Participants                                                                                 | Methods                                                                                                   | Intramuscular hormones       | Intramuscular enzymes                                                              | Key findings (older compared to younger controls)                                                                                  |
|---------------------------------------------|-----------------|----------------------------------------------------------------------------------------------|-----------------------------------------------------------------------------------------------------------|------------------------------|------------------------------------------------------------------------------------|------------------------------------------------------------------------------------------------------------------------------------|
| Pöllänen <i>et al.</i> (2015) <sup>59</sup> | Cross-sectional | 8 premenopausal females (32 ± 2 years old),<br>8 postmenopausal females (58 ± 2 years old)   | Intramuscular hormones measured via ELISA.                                                                | E2, DHEA, DHT, testosterone  |                                                                                    | ↔ E2<br>↔ DHEA<br>↑ DHT<br>↔ Testosterone                                                                                          |
| Pöllänen <i>et al.</i> (2011) <sup>53</sup> | Cross-sectional | 13 premenopausal females (33 ± 2 years old),<br>13 postmenopausal females (64 ± 2 years old) | Intramuscular hormones were measured via ELISA. Intramuscular enzymes were measured via quantitative PCR. | E2, DHEA, DHT, testosterone  | <b>mRNA</b><br>3β-HSD, 5α-reductase type 1, 5α-reductase type 2, 17β-HSD, P450arom | ↑ E2<br>↔ DHEA<br>↔ DHT<br>↑ Testosterone<br>↑ P450arom<br>↑ 3β-HSD<br>↔ 5α-reductase type 1<br>↔ 5α-reductase type 2<br>↔ 17β-HSD |
| Sato <i>et al.</i> (2014) <sup>54</sup>     | Cross-sectional | 6 young males (24.3 ± 1.3 years old),<br>13 old males (67.2 ± 1.8 years old)                 | Intramuscular hormones were measured via EIA. Intramuscular enzymes were measured via western blotting.   | DHEA, DHT, Free testosterone | <b>Protein</b><br>3β-HSD, 5α-reductase, 17β-HSD                                    | ↓ DHEA<br>↓ DHT<br>↓ Free testosterone<br>↓ 3β-HSD<br>↓ 5α-reductase<br>↓ 17β-HSD                                                  |

3β-HSD, 3-beta-hydroxysteroid dehydrogenase; 17β-HSD, 17-beta-hydroxysteroid dehydrogenase; DHEA, dehydroepiandrosterone; DHT, dihydrotestosterone; E2, oestradiol; ELISA, enzyme linked immunosorbent assay; EIA, Enzyme immunoassay; P450arom, aromatase cytochrome P-450; PCR, polymerase chain reaction. ↑ significant increase, ↓ significant decrease, ↔ no significant difference.

**Table 2.** Studies investigating the relationship between intramuscular hormones and muscle mass and function

| Study                                       | Participants                                     | Exercise type | Intervention                                                                                                                                                                                                                                                                                            | Intramuscular hormones                               | Intramuscular enzymes                                                                                 | Key findings                                                                                                                                                                                                                                                                                                                                                                                                                                                                                                                                                                                                                                                                                                                                                                                                                                                                                                                                                                                                                                                                                                                                                                                                                                                                                                                                                                                  |
|---------------------------------------------|--------------------------------------------------|---------------|---------------------------------------------------------------------------------------------------------------------------------------------------------------------------------------------------------------------------------------------------------------------------------------------------------|------------------------------------------------------|-------------------------------------------------------------------------------------------------------|-----------------------------------------------------------------------------------------------------------------------------------------------------------------------------------------------------------------------------------------------------------------------------------------------------------------------------------------------------------------------------------------------------------------------------------------------------------------------------------------------------------------------------------------------------------------------------------------------------------------------------------------------------------------------------------------------------------------------------------------------------------------------------------------------------------------------------------------------------------------------------------------------------------------------------------------------------------------------------------------------------------------------------------------------------------------------------------------------------------------------------------------------------------------------------------------------------------------------------------------------------------------------------------------------------------------------------------------------------------------------------------------------|
| Aizawa <i>et al.</i> (2011) <sup>60</sup>   | 11 male Sprague Dawley rats (10 weeks old)       | Chronic AE    | <b>Intervention group</b> (n=5): 12 weeks of motorised treadmill running 5 d w <sup>-1</sup> at 30 m min <sup>-1</sup> , for 30 min which increased to 60 m min <sup>-1</sup> and was thereafter maintained. <b>Control group</b> (n=6): were confined to their cages but handled 5 d w <sup>-1</sup> . | E2, DHEA, DHT, Free testosterone, Total testosterone | <b>mRNA:</b> 3β-HSD, 5α-reductase, 17β-HSD, P450arom. <b>Protein:</b> 5α-reductase, 17β-HSD, P450arom | GC mass/BW & DHT level: r=0.41, p=0.05<br><br>GC mass/BW was not correlated to the levels of intramuscular DHEA, free testosterone, total testosterone, and E2                                                                                                                                                                                                                                                                                                                                                                                                                                                                                                                                                                                                                                                                                                                                                                                                                                                                                                                                                                                                                                                                                                                                                                                                                                |
| Dalgaard <i>et al.</i> (2022) <sup>45</sup> | 10 postmenopausal females (54.6 ± 3.8 years old) | Chronic RE    | Progressive RE including leg press, knee extension, triceps extension, sit-ups, and back extension. Acute, one session. Chronic, 3d week <sup>-1</sup> for 12 weeks.                                                                                                                                    | DHEA, E2, Testosterone                               | -                                                                                                     | <b>Cross-sectional data at baseline</b><br>E2 R <sup>2</sup> <0.18, p>0.11 for muscle CSA, LBM, MVCex, MVCflex, CMJ, and muscle quality.<br><br>Testosterone R <sup>2</sup> <0.14, p>0.15 for muscle CSA, LBM, MVCex, MVCflex, CMJ, and muscle quality.<br><br>DHEA vs. LBM R <sup>2</sup> =0.52, p=0.004 (negative association)<br>DHEA vs. muscle CSA R <sup>2</sup> =0.34, p=0.027 (negative association)<br>DHEA R <sup>2</sup> ≤0.18, p≥0.13 for MVCex, MVCflex, CMJ, and muscle quality.<br><br><b>Δ IM hormone vs. Δ muscle mass/strength across the intervention</b><br>E2 vs. muscle quality R <sup>2</sup> =0.378, p=0.044 (the better maintainance of E2 the greater improvement in quality)<br>E2 R <sup>2</sup> ≤0.299, p≥0.082 for muscle CSA, LBM, MVCex, MVCflex, and CMJ.<br><br>Testosterone vs. MVCex R <sup>2</sup> =0.389, p=0.040 (the better maintainance of testosterone the greater improvement in MVCex)<br>Testosterone vs. muscle quality R <sup>2</sup> =0.422, p=0.031 (the better maintainance of testosterone the greater improvement in quality)<br>Testosterone R <sup>2</sup> ≤0.296, p≥0.084 for muscle CSA, LBM, MVCflex, and CMJ.<br><br>DHEA vs. MVCex R <sup>2</sup> =0.453, p=0.023 (the better maintainance of DHEA the greater improvement in MVCex)<br>DHEA R <sup>2</sup> ≤0.257, p≥0.111 for muscle CSA, LBM, MVCflex, CMJ, and muscle quality. |
| Feng <i>et al.</i> (2019) <sup>61</sup>     | C2C12 cells                                      | Acute stretch | Muscle cells were mechanically stretched at for 8h at 0.5Hz and 10% amplitude.                                                                                                                                                                                                                          | E2                                                   | <b>mRNA:</b> 3β-HSD, 17β-HSD, P450arom. <b>Protein:</b> 3β-HSD, 17β-HSD, P450arom.                    | <b>E2 concentration and cell proliferation index</b><br>r <sub>s</sub> =0.758, p<0.011.                                                                                                                                                                                                                                                                                                                                                                                                                                                                                                                                                                                                                                                                                                                                                                                                                                                                                                                                                                                                                                                                                                                                                                                                                                                                                                       |

|                                                                                                                 |                                                                                                                                                                             |            |                                                                                                                                                                                                                                                                                                                                                                                                                                                     |                         |                                               |                                                                                                                                                                                                                                                                                                                                                                                                                                                                                                                                                                                                                                                                                                                                                                                                                                                                                                                                                                                                                                                                                                                                                                                                                                                                                                                                                                                                                                                                                                                                                                                                                                                                                                                                                                                                                    |
|-----------------------------------------------------------------------------------------------------------------|-----------------------------------------------------------------------------------------------------------------------------------------------------------------------------|------------|-----------------------------------------------------------------------------------------------------------------------------------------------------------------------------------------------------------------------------------------------------------------------------------------------------------------------------------------------------------------------------------------------------------------------------------------------------|-------------------------|-----------------------------------------------|--------------------------------------------------------------------------------------------------------------------------------------------------------------------------------------------------------------------------------------------------------------------------------------------------------------------------------------------------------------------------------------------------------------------------------------------------------------------------------------------------------------------------------------------------------------------------------------------------------------------------------------------------------------------------------------------------------------------------------------------------------------------------------------------------------------------------------------------------------------------------------------------------------------------------------------------------------------------------------------------------------------------------------------------------------------------------------------------------------------------------------------------------------------------------------------------------------------------------------------------------------------------------------------------------------------------------------------------------------------------------------------------------------------------------------------------------------------------------------------------------------------------------------------------------------------------------------------------------------------------------------------------------------------------------------------------------------------------------------------------------------------------------------------------------------------------|
| Morton <i>et al.</i> (2018) <sup>39</sup>                                                                       | 56 younger males (23 ± 2 years old).<br><br>Data presented is a subgroup analysis (n=20) from the highest (n=10) and lowest (n=10) responders to the exercise intervention. | Chronic RE | Participants were randomised into either LR or HR. <b>HR:</b> 3 sets of 20-25 repetitions at 30-50%1RM to volitional failure. <b>LR:</b> 3 sets of 8-12 repetitions at 75-90%1RM to volitional failure. Both conditions trained 4d week <sup>-1</sup> for 12 weeks, and the program included: leg press, seated row, bench press, hamstring curl, planks, shoulder press, bicep curls, tricep extensions, wide-grip pull downs, and knee extension. | DHT, Testosterone       | <b>Protein:</b> 5α-reductase                  | <p><b><u>Baseline IM hormone/enzyme vs. Δ fibre CSA and Δ lean body mass</u></b><br/>           Free testosterone vs. TI CSA r=-0.16, p&gt;0.05<br/>           Free testosterone vs. TII CSA r=-0.04, p&gt;0.05<br/>           Free testosterone vs. LBM r=-0.33, p&gt;0.05<br/>           DHT vs. TI CSA r=-0.23, p&gt;0.05<br/>           DHT vs. TII CSA r=-0.20, p&gt;0.05<br/>           DHT vs. LBM r=-0.23, p&gt;0.05<br/>           5α-reductase vs. TI CSA r=-0.33, p&gt;0.05<br/>           5α-reductase vs. TII CSA r=-0.43, p&gt;0.05<br/>           5α-reductase vs. LBM r=0.24, p&gt;0.05</p> <p><b><u>Outcome IM hormone/enzyme vs. Δ fibre CSA and Δ lean body mass</u></b><br/>           Free testosterone vs. TI CSA r=-0.15, p&gt;0.05<br/>           Free testosterone vs. TII CSA r=0.02, p&gt;0.05<br/>           Free testosterone vs. LBM r=-0.36, p&gt;0.05<br/>           DHT vs. TI CSA r=0.13, p&gt;0.05<br/>           DHT vs. TII CSA r=-0.21, p&gt;0.05<br/>           DHT vs. LBM r=-0.22, p&gt;0.05<br/>           5α-reductase vs. TI CSA r=-0.04, p&gt;0.05<br/>           5α-reductase vs. TII CSA r=-0.06, p&gt;0.05<br/>           5α-reductase vs. LBM r=0.43, p&gt;0.05</p> <p><b><u>Δ IM hormone/enzyme vs. Δ fibre CSA and Δ lean body mass</u></b><br/>           Free testosterone vs. TI CSA r=-0.03, p&gt;0.05<br/>           Free testosterone vs. TII CSA r=0.05, p&gt;0.05<br/>           Free testosterone vs. LBM r=0.10, p&gt;0.05<br/>           DHT vs. TI CSA r=0.27, p&gt;0.05<br/>           DHT vs. TII CSA r=0.30, p&gt;0.05<br/>           DHT vs. LBM r=0.05, p&gt;0.05<br/>           5α-reductase vs. TI CSA r=0.24, p&gt;0.05<br/>           5α-reductase vs. TII CSA r=0.29, p&gt;0.05<br/>           5α-reductase vs. LBM r=0.30, p&gt;0.05</p> |
| <i>Associations below have been calculated as percentage changes in variables over the intervention period.</i> |                                                                                                                                                                             |            |                                                                                                                                                                                                                                                                                                                                                                                                                                                     |                         |                                               |                                                                                                                                                                                                                                                                                                                                                                                                                                                                                                                                                                                                                                                                                                                                                                                                                                                                                                                                                                                                                                                                                                                                                                                                                                                                                                                                                                                                                                                                                                                                                                                                                                                                                                                                                                                                                    |
| Sato <i>et al.</i> (2014) <sup>54</sup>                                                                         | 13 older males (67.2 ± 1.8 years old)                                                                                                                                       | Chronic RE | 3 sets of 10 repetitions of leg extension and leg flexion at 70% of 1RM, 3d week <sup>-1</sup> for 12 weeks.                                                                                                                                                                                                                                                                                                                                        | DHEA, DHT, Testosterone | <b>Protein:</b> 3β-HSD, 17β-HSD, 5α-reductase | <p><b><u>IM hormone vs. Isokinetic strength</u></b><br/>           DHEA r=0.493, p=0.034<br/>           DHT r=0.617, p&lt;0.001<br/>           Free testosterone r=0.532, p&lt;0.001</p> <p><b><u>IM hormone vs. Muscle CSA</u></b><br/>           DHEA r=0.413, p=0.078<br/>           DHT r=0.521, p&lt;0.001<br/>           Free testosterone r=0.515, p=0.002</p>                                                                                                                                                                                                                                                                                                                                                                                                                                                                                                                                                                                                                                                                                                                                                                                                                                                                                                                                                                                                                                                                                                                                                                                                                                                                                                                                                                                                                                              |

|                                             |                                                                                              |            |                                                                                                                                                                                                                                                                                                 |                             |                                                                        |                                                                                                                                                                                                                                                                                                                                                                                                                                                                                                                                                                                                                                                                                                                                       |
|---------------------------------------------|----------------------------------------------------------------------------------------------|------------|-------------------------------------------------------------------------------------------------------------------------------------------------------------------------------------------------------------------------------------------------------------------------------------------------|-----------------------------|------------------------------------------------------------------------|---------------------------------------------------------------------------------------------------------------------------------------------------------------------------------------------------------------------------------------------------------------------------------------------------------------------------------------------------------------------------------------------------------------------------------------------------------------------------------------------------------------------------------------------------------------------------------------------------------------------------------------------------------------------------------------------------------------------------------------|
| Shi <i>et al.</i> (2019) <sup>62</sup>      | 14 ovariectomised female Sprague Dawley rats (12 weeks old)                                  | Chronic AE | <b>Intervention:</b> 5 weeks of motorised treadmill running 6d week <sup>-1</sup> . During the first week, speed and duration were progressively increased to 60min, 20m/min, which was maintain for the intervention period.<br><b>Control:</b> Same procedures but treadmill was not started. | E2                          | <b>Protein:</b> P450arom                                               | Soleus mass vs. E2 levels $r=0.65$ , $p<0.05$                                                                                                                                                                                                                                                                                                                                                                                                                                                                                                                                                                                                                                                                                         |
| Pöllänen <i>et al.</i> (2015) <sup>59</sup> | 8 premenopausal females (32 ± 2 years old),<br>8 postmenopausal females (58 ± 2 years old)   | -          | No intervention (cross-sectional study)                                                                                                                                                                                                                                                         | E2, DHEA, DHT, testosterone |                                                                        | <p><b>[IM hormone] vs. Muscle strength (knee extensor)</b><br/>E2 <math>R^2=0.392</math>, <math>p=0.013</math> (positive association)<br/>Testosterone <math>R^2=0.438</math>, <math>p=0.007</math> (positive association)<br/>DHT <math>R^2=0.008</math>, <math>p=0.747</math><br/>DHEA <math>R^2=0.348</math>, <math>p=0.021</math> (positive association)</p> <p><b>[IM hormone] vs. Muscle power (vertical jump height)</b><br/>E2 <math>R^2=0.469</math>, <math>p=0.005</math> (positive association)<br/>Testosterone <math>R^2=0.370</math>, <math>p=0.016</math> (positive association)<br/>DHT <math>R^2=0.033</math>, <math>p=0.520</math><br/>DHEA <math>R^2=0.390</math>, <math>p=0.013</math> (positive association)</p> |
| Pöllänen <i>et al.</i> (2011) <sup>53</sup> | 13 premenopausal females (33 ± 2 years old),<br>13 postmenopausal females (64 ± 2 years old) | -          | No intervention (cross-sectional study)                                                                                                                                                                                                                                                         | DHEA, DHT, E2, testosterone | <b>mRNA:</b> 3β-HSD, 5α-reductase type 1, 5α-reductase type 2, 17β-HSD | <p><b>[IM hormone] vs. Muscle force per CSA</b><br/>DHEA <math>r=0.228</math>, <math>p=0.273</math><br/>DHT <math>r=-0.130</math>, <math>p=0.537</math><br/>E2 <math>r=-0.142</math>, <math>p=0.499</math><br/>Testosterone <math>r=-0.050</math>, <math>p=0.811</math></p> <p><b>[IM hormone] vs. QF attenuation</b><br/>DHEA <math>r=-0.381</math>, <math>p=0.060</math><br/>DHT <math>r=-0.337</math>, <math>p=0.099</math><br/>E2 <math>r=-0.469</math>, <math>p=0.018</math><br/>Testosterone <math>r=-0.573</math>, <math>p=0.003</math></p>                                                                                                                                                                                    |

3β-HSD, 3-beta-hydroxysteroid dehydrogenase; 17β-HSD, 17-beta-hydroxysteroid dehydrogenase; AE, aerobic exercise; BW, body weight; CMJ, counter movement jump; CSA, cross sectional area; DHEA, dehydroepiandrosterone; DHT, dihydrotestosterone; E2, oestradiol; GC, gastrocnemius; HR, high repetition; IM, intramuscular; LBM, lean body mass; LR, low repetition; MVCex, maximal voluntary contraction extension; MVCflex, maximal voluntary contraction flexion; P450arom, aromatase cytochrome P-450; QF, quadriceps femoris; RE, resistance exercise.



**Table 3.** Studies investigating the relationship between exercise and intramuscular sex hormone biosynthesis

| Study                                     | Subjects                                                 | Intervention | Exercise protocol                                                                                                                                                                                                                                                                                                                       | Methods                                                                                         | Intramuscular hormones                               | Intramuscular enzymes                                                                                        | Key findings (compared to controls or pre-test)                                                                                                                                                                                                                 |
|-------------------------------------------|----------------------------------------------------------|--------------|-----------------------------------------------------------------------------------------------------------------------------------------------------------------------------------------------------------------------------------------------------------------------------------------------------------------------------------------|-------------------------------------------------------------------------------------------------|------------------------------------------------------|--------------------------------------------------------------------------------------------------------------|-----------------------------------------------------------------------------------------------------------------------------------------------------------------------------------------------------------------------------------------------------------------|
| Aizawa <i>et al.</i> (2011) <sup>60</sup> | 11 male Sprague Dawley rats (10 weeks old)               | Chronic AE   | <p><b>Intervention group</b> (n=5): 12 weeks of motorised treadmill running 5 d·w<sup>-1</sup> at 30 m·min<sup>-1</sup>, for 30 min which increased to 60 m·min<sup>-1</sup>, for 30 min during week and was thereafter maintained.</p> <p><b>Control group</b> (n=6): were confined to their cages but handled 5 d·w<sup>-1</sup>.</p> | Gastrocnemius was excised 48h after the final session. IM sex hormones were measured via EIA.   | E2, DHEA, DHT, Free testosterone, Total testosterone | <p><b>mRNA:</b> 3β-HSD, 5α-reductase, 17β-HSD, P450arom. <b>Protein:</b> 5α-reductase, 17β-HSD, P450arom</p> | <p>↔ E2<br/>↔ DHEA<br/>↔ Free testosterone<br/>↔ Total testosterone<br/>↑ DHT<br/>↑ 3β-HSD mRNA<br/>↑ 5α-reductase mRNA, ↑ 5α-reductase protein<br/>↔ 17β-HSD mRNA, ↔ 17β-HSD protein<br/>↑ P450arom mRNA, ↑ P450arom protein</p>                               |
| Aizawa <i>et al.</i> (2010) <sup>63</sup> | 16 male and 16 female Sprague Dawley rats (10 weeks old) | Acute AE     | <p><b>Intervention group</b> (n=16): motorised treadmill running 30 m·min<sup>-1</sup>, for 30 min.</p> <p><b>Control group</b> (n=16): remained at rest for 30 min on a stopped treadmill.</p>                                                                                                                                         | Gastrocnemius was excised immediately after the session. IM sex hormones were measured via EIA. | DHEA, DHT, Free testosterone                         | <p><b>mRNA:</b> 5α-reductase type 1. <b>Protein:</b> 5α-reductase type 1</p>                                 | <p><b>Males</b><br/>↑ DHEA<br/>↑ DHT<br/>↑ Free testosterone<br/>↔ 5α-reductase type 1 mRNA, ↑ 5α-reductase type 1 protein</p> <p><b>Females</b><br/>↑ DHEA<br/>↑ DHT<br/>↑ Free testosterone<br/>↑ 5α-reductase type 1 mRNA, ↑ 5α-reductase type 1 protein</p> |

|                                             |                                                          |                        |                                                                                                                                                                                                |                                                                                                                                                                                    |                        |                                                                                                                                                                                                     |                                                                                                                                                                                                                                                                                  |
|---------------------------------------------|----------------------------------------------------------|------------------------|------------------------------------------------------------------------------------------------------------------------------------------------------------------------------------------------|------------------------------------------------------------------------------------------------------------------------------------------------------------------------------------|------------------------|-----------------------------------------------------------------------------------------------------------------------------------------------------------------------------------------------------|----------------------------------------------------------------------------------------------------------------------------------------------------------------------------------------------------------------------------------------------------------------------------------|
| Aizawa <i>et al.</i> (2008) <sup>64</sup>   | 16 male and 16 female Sprague Dawley rats (10 weeks old) | Acute AE               | <b>Intervention group</b><br>(n=16): motorised treadmill running 30 m · min <sup>-1</sup> , for 30 min.<br><b>Control group</b><br>(n=16): remained at rest for 30 min on a stopped treadmill. | Gastrocnemius was excised immediately after the session. IM sex hormones were measured via EIA.                                                                                    | E2, Testosterone       | <b>mRNA:</b> 3β-HSD, 17β-HSD, P450arom.<br><b>Protein:</b> 17β-HSD, P450arom.                                                                                                                       | <b>Males</b><br>↑ E2<br>↑ Testosterone<br>↑ 3β-HSD mRNA<br>↔ 17β-HSD mRNA, ↑ 17β-HSD protein<br>↑ P450arom mRNA, ↑ P450arom protein<br><br><b>Females</b><br>↔ E2<br>↑ Testosterone<br>↔ 3β-HSD mRNA<br>↑ 17β-HSD mRNA, ↑ 17β-HSD protein<br>↓ P450arom mRNA, ↓ P450arom protein |
| Cardaci <i>et al.</i> (2020) <sup>65</sup>  | 10 males (23.2 ± 4.68 years old)                         | Acute RE               | Full body RE including 3 sets of bench press, leg press, lat pulldown, and leg extension at 80% of 1RM (HL) and 50% of 1RM (LL) to volitional failure in different sessions.                   | VL biopsies were taken pre, 3h and 24h post the session. IM sex hormones were measured via ELISA.                                                                                  | DHT, Testosterone      | <b>3h post exercise</b><br>↔ DHT (HL), ↔ DHT (LL)<br>↔ Testosterone (HL), ↔ Testosterone (LL)<br><br><b>24h post exercise</b><br>↔ DHT (HL), ↔ DHT (LL)<br>↔ Testosterone (HL), ↔ Testosterone (LL) |                                                                                                                                                                                                                                                                                  |
| Dalgaard <i>et al.</i> (2022) <sup>45</sup> | 10 postmenopausal females (54.6 ± 3.8 years old)         | Acute RE<br>Chronic RE | Progressive RE including leg press, knee extension, triceps extension, sit-ups, and back extension. Acute, one session. Chronic, 3d-week <sup>-1</sup> for 12 weeks.                           | VL biopsy taken pre intervention, and pre (>72h since last session) and 1-2 h post the final session (acute) of the chronic intervention. IM sex hormones were measured via ELISA. | DHEA, E2, Testosterone | <b>Acute</b><br>↔ DHEA<br>↔ E2<br>↔ Testosterone<br><br><b>Chronic</b><br>↓ DHEA<br>↓ E2<br>↓ Testosterone                                                                                          |                                                                                                                                                                                                                                                                                  |

|                                           |                                                    |               |                                                                                                                                                                                                                     |                                                                                                             |    |                                                                                                                                                                                                                                                        |
|-------------------------------------------|----------------------------------------------------|---------------|---------------------------------------------------------------------------------------------------------------------------------------------------------------------------------------------------------------------|-------------------------------------------------------------------------------------------------------------|----|--------------------------------------------------------------------------------------------------------------------------------------------------------------------------------------------------------------------------------------------------------|
| Feng <i>et al.</i> (2019) <sup>61</sup>   | C2C12 cells                                        | Acute stretch | Cells were mechanically stretched at for 8h at 0.5Hz and 10% amplitude.                                                                                                                                             | C2C12 cells were harvested 24h after the stretch intervention. IM sex hormones were measured via ELISA.     | E2 | <b>mRNA:</b> 3 $\beta$ -HSD, 17 $\beta$ -HSD, P450arom. $\downarrow$ 3 $\beta$ -HSD mRNA, $\uparrow$ 3 $\beta$ -HSD protein<br><b>Protein:</b> 3 $\beta$ -HSD, 17 $\beta$ -HSD, P450arom. $\uparrow$ P450arom mRNA, $\leftrightarrow$ P450arom protein |
| Haines <i>et al.</i> (2018) <sup>66</sup> | 22 eumenorrheic females (20.9 $\pm$ 1.4 years old) | Acute RE      | 10 sets of 10 repetitions of unilateral, eccentric leg extension at an isokinetic speed of 30°/second. Protocol conducted once during the MF phase and ML phase, day 6 and 21 of the menstrual cycle, respectively. | VL biopsies were obtained pre, 6h post, and 24h post each session. IM sex hormones were measured via ELISA. | E2 | <b>6h post exercise</b><br>$\leftrightarrow$ E2 (MF)<br>$\leftrightarrow$ E2 (ML)<br><br><b>24h post exercise</b><br>$\leftrightarrow$ E2 (MF)<br>$\leftrightarrow$ E2 (ML)                                                                            |

|                                           |                                                                                                                                                                                    |            |                                                                                                                                                                                                                                                                                                                                                                                                                                                           |                                                                                                                    |                                     |                                                                                                                                                                            |                                                                                          |
|-------------------------------------------|------------------------------------------------------------------------------------------------------------------------------------------------------------------------------------|------------|-----------------------------------------------------------------------------------------------------------------------------------------------------------------------------------------------------------------------------------------------------------------------------------------------------------------------------------------------------------------------------------------------------------------------------------------------------------|--------------------------------------------------------------------------------------------------------------------|-------------------------------------|----------------------------------------------------------------------------------------------------------------------------------------------------------------------------|------------------------------------------------------------------------------------------|
| Morton <i>et al.</i> (2018) <sup>39</sup> | <p>56 younger males (23 ± 2 years old).</p> <p>Data presented is a subgroup analysis (n=20) from the highest (n=10) and lowest (n=10) responders to the exercise intervention.</p> | Chronic RE | <p>Participants were randomised into either LR or HR. <b>HR:</b> 3 sets of 20-25 repetitions at 30-50%1RM to volitional failure. <b>LR:</b> 3 sets of 8-12 repetitions at 75-90%1RM to volitional failure. Both conditions trained 4d·week<sup>-1</sup> for 12 weeks, and the program included: leg press, seated row, bench press, hamstring curl, planks, shoulder press, bicep curls, tricep extensions, wide-grip pull downs, and knee extension.</p> | DHT, Testosterone                                                                                                  | <p><b>Protein:</b> 5α-reductase</p> | <p><b>High responders</b></p> <p>↔ Free testosterone<br/>↔ DHT<br/>↑ 5α-reductase</p> <p><b>Low responders</b></p> <p>↔ Free testosterone<br/>↔ DHT<br/>↔ 5α-reductase</p> |                                                                                          |
| Sato <i>et al.</i> (2014) <sup>54</sup>   | <p>13 older males (67.2 ± 1.8 years old)</p>                                                                                                                                       | Chronic RE | <p>3 sets of 10 repetitions of leg extension and leg flexion at 70% of 1RM, 3d·week<sup>-1</sup> for 12 weeks.</p>                                                                                                                                                                                                                                                                                                                                        | <p>VL biopsies were obtained pre and 4-5 days post the final session. IM sex hormones were measured via ELISA.</p> | DHEA, DHT, Testosterone             | <p><b>Protein:</b> 3β-HSD, 17β-HSD, 5α-reductase</p>                                                                                                                       | <p>↑ DHEA<br/>↑ DHT<br/>↑ Testosterone<br/>↑ 3β-HSD<br/>↑ 17β-HSD<br/>↑ 5α-reductase</p> |

|                                           |                                                             |            |                                                                                                                                                                                                                                                                                                          |                                                                                                                               |                         |                                     |                                                                                                                                                                                                                                                                            |
|-------------------------------------------|-------------------------------------------------------------|------------|----------------------------------------------------------------------------------------------------------------------------------------------------------------------------------------------------------------------------------------------------------------------------------------------------------|-------------------------------------------------------------------------------------------------------------------------------|-------------------------|-------------------------------------|----------------------------------------------------------------------------------------------------------------------------------------------------------------------------------------------------------------------------------------------------------------------------|
| Shi <i>et al.</i> (2019) <sup>62</sup>    | 14 ovariectomised female Sprague Dawley rats (12 weeks old) | Chronic AE | <p><b>Intervention:</b> 5 weeks of motorised treadmill running 6d·week<sup>-1</sup>. During the first week, speed and duration were progressively increased to 60min, 20m/min, which was maintain for the intervention period.</p> <p><b>Control:</b> Same procedures but treadmill was not started.</p> | Soleus and plantaris muscles were used for analysis. Unclear when they were excised. IM sex hormones were measured via ELISA. | E2                      | <b>Protein:</b> P450arom            | <p><b>Soleus</b><br/>           ↑ E2 (ELISA), ↑ E2 (immunofluorescence)<br/>           ↑ P450arom (WB &amp; immunofluorescence)</p> <p><b>Plantaris</b><br/>           ↔ E2 (ELISA), ↑ E2 (immunofluorescence)<br/>           ↑ P450arom (WB &amp; immunofluorescence)</p> |
| Son <i>et al.</i> (2019) <sup>69</sup>    | C2C12 cells                                                 | Acute EPS  | The cells were electrically stimulated for 24h (1Hz, 2ms, 40V/60mm)                                                                                                                                                                                                                                      | IM sex hormones were measured via ELISA.                                                                                      | DHT, free testosterone  | <b>Protein:</b> 5α-reductase type I | ↔ DHT (EPS trending higher, p=0.0556)<br>↑ Free testosterone<br>↑ 5α-reductase type I                                                                                                                                                                                      |
| Vechin <i>et al.</i> (2023) <sup>67</sup> | 6 young males (26 ± 5 years old)                            | Acute RE   | <p><b>Low hormone (LH) condition:</b> Single arm lateral raised 10 sets of 8-12 RM.</p> <p><b>High hormone (HH) condition:</b> Same as LH but with additional back squat in a Smith machine 10 sets of 8-12RM.</p>                                                                                       | Deltoid biopsies were taken pre and 45 minutes post the sessions. IM sex hormones were measured via EIA.                      | DHEA, DHT, Testosterone | -                                   | <p><b>LH</b><br/>           ↔ DHEA<br/>           ↔ DHT<br/>           ↔ Testosterone</p> <p><b>HH</b><br/>           ↔ DHEA<br/>           ↔ DHT<br/>           ↔ Testosterone</p>                                                                                        |

798

|                                            |                                                                             |          |                                                                   |                                                                                                            |              |                                 |                                                                                                                          |
|--------------------------------------------|-----------------------------------------------------------------------------|----------|-------------------------------------------------------------------|------------------------------------------------------------------------------------------------------------|--------------|---------------------------------|--------------------------------------------------------------------------------------------------------------------------|
| Vingren <i>et al.</i> (2008) <sup>68</sup> | 8 young males (21 ± 1 years old), 7 eumenorrheic females (24 ± 5 years old) | Acute RE | RE consisted of 6 sets of 10 repetitions at 80% of 1RM in squats. | VL biopsies were obtained pre, 10m post, and 70m after the session. IM sex hormones were measured via EIA. | Testosterone | <b>Protein:</b> 3β-HSD, 17β-HSD | <b>Males</b><br>↔ Testosterone<br>↔ 3β-HSD<br>↔ 17β-HSD<br><br><b>Females</b><br>↔ Testosterone<br>↔ 3β-HSD<br>↔ 17β-HSD |
|--------------------------------------------|-----------------------------------------------------------------------------|----------|-------------------------------------------------------------------|------------------------------------------------------------------------------------------------------------|--------------|---------------------------------|--------------------------------------------------------------------------------------------------------------------------|

3β-HSD, 3-beta-hydroxysteroid dehydrogenase; 17β-HSD, 17-beta-hydroxysteroid dehydrogenase; AE, aerobic exercise; DHEA, dehydroepiandrosterone; DHT, dihydrotestosterone; E2, oestradiol; ELISA, enzyme linked immunosorbent assay; EIA, Enzyme immunoassay; HH, high hormone; HL, high load; HR, high repetition; IM, intramuscular; LH, low hormone; LL, low load; LR, low repetition; MF, mid follicular; ML, mid luteal; P450arom, aromatase cytochrome P-450; RE, resistance exercise; VL, vastus lateralis. ↑ significant increase, ↓ significant decrease, ↔ no significant difference.

799
